# Supplementary material for: An Aminopyrimidone and Aminoimidazoles Alkaloids from the Rodrigues Calcareous Marine Sponge Ernsta naturalis
Source: MDPI journal article supplement (doi:10.3390/md20100637), 2022-10-13

# An Aminopyrimidone and Aminoimidazoles Alkaloids from the Rodrigues Calcareous Marine Sponge *Ernsta naturalis*

Pierre-Eric Campos<sup>1,2</sup>, Gaëtan Herbette<sup>3</sup>, Laetitia Fougère<sup>2</sup>, Patricia Clerc<sup>1</sup>, Florent Tintillier<sup>1</sup>, Nicole J. de Voogd<sup>4,5</sup>, Géraldine Le Goff<sup>6</sup>, Jamal Ouazzani<sup>6</sup> and Anne Gauvin-Bialecki<sup>1\*</sup>

<sup>1</sup> Laboratoire de chimie et de biotechnologie des produits naturels, Faculté des Sciences et Technologies, Université de La Réunion, 15 Avenue René Cassin, CS 92003, 97744 Saint-Denis Cedex 9, La Réunion, France

<sup>2</sup> Institut de Chimie Organique et Analytique, Université d'Orléans – CNRS - Pôle de chimie, rue de Chartres – UMR 6759, BP6759, 45067 Orléans Cedex 2, France

<sup>3</sup> Aix-Marseille Univ, CNRS, Centrale Marseille, FSCM, Spectropole, Campus de St Jérôme-Service 511, 13397 Marseille, France

<sup>4</sup> Naturalis Biodiversity Center, Darwinweg 2, 2333 CR Leiden, Netherlands

<sup>5</sup> Institute of Environmental Sciences, Leiden University, Einsteinweg 2, 2333 CC Leiden, Netherlands

<sup>6</sup> Institut de Chimie des Substances Naturelles, CNRS UPR 2301, Univ. Paris-Sud, Université Paris-Saclay, 1, av. de la Terrasse, 91198 Gif-sur-Yvette, France

\* Correspondence: anne.bialecki@univ-reunion.fr; Tel.: +262 262 93 81 97

## Supporting information

|                                                                                                                                          |    |
|------------------------------------------------------------------------------------------------------------------------------------------|----|
| <b>Figure S1:</b> HRESIMS spectrum for ernstine A (1) .....                                                                              | 4  |
| <b>Figure S2:</b> <sup>1</sup> H NMR (600 MHz, CD <sub>3</sub> OD) spectrum for ernstine A (1).....                                      | 4  |
| <b>Figure S3:</b> <sup>1</sup> H- <sup>1</sup> H COSY NMR (600 MHz) spectrum for ernstine A (1).....                                     | 5  |
| <b>Figure S4:</b> <sup>1</sup> H- <sup>13</sup> C HSQC NMR (600 MHz) spectrum for ernstine A (1) .....                                   | 5  |
| <b>Figure S5:</b> <sup>1</sup> H- <sup>13</sup> C HMBC NMR (600 MHz) spectrum for ernstine A (1) .....                                   | 6  |
| <b>Figure S6:</b> <sup>1</sup> H- <sup>1</sup> H NOESY NMR (600 MHz) spectrum for ernstine A (1) .....                                   | 7  |
| <b>Figure S7:</b> HRESIMS spectrum for phorbatopsin D (2) .....                                                                          | 7  |
| <b>Figure S8:</b> <sup>1</sup> H NMR (600 MHz, CD <sub>3</sub> OD) spectrum for phorbatopsin D (2) .....                                 | 8  |
| <b>Figure S9:</b> <sup>13</sup> C NMR (125 MHz, CD <sub>3</sub> OD) spectrum for phorbatopsin D (2).....                                 | 8  |
| <b>Figure S10:</b> <sup>1</sup> H- <sup>13</sup> C HSQC NMR (600 MHz) spectrum for phorbatopsin D (2) .....                              | 9  |
| <b>Figure S11:</b> <sup>1</sup> H- <sup>13</sup> C HMBC NMR (600 MHz) spectrum for phorbatopsin D (2) .....                              | 9  |
| <b>Figure S12:</b> HRESIMS spectrum for phorbatopsin E (3).....                                                                          | 10 |
| <b>Figure S13:</b> <sup>1</sup> H NMR (600 MHz, CD <sub>3</sub> OD) spectrum for phorbatopsin E (3) .....                                | 10 |
| <b>Figure S14:</b> <sup>1</sup> H- <sup>13</sup> C HSQC NMR (600 MHz) spectrum for phorbatopsin E (3).....                               | 11 |
| <b>Figure S15:</b> <sup>1</sup> H- <sup>13</sup> C HMBC NMR (600 MHz) spectrum for phorbatopsin E (3).....                               | 11 |
| <b>Figure S16:</b> <sup>1</sup> H- <sup>1</sup> H NOESY NMR (600 MHz) spectrum for phorbatopsin E (3) .....                              | 12 |
| <b>Figure S17:</b> HRESIMS spectrum for calcaridine C (4).....                                                                           | 12 |
| <b>Figure S18:</b> <sup>1</sup> H NMR (600 MHz, CD <sub>3</sub> OD) spectrum for calcaridine C (4) .....                                 | 13 |
| <b>Figure S19:</b> <sup>13</sup> C NMR (125 MHz, CD <sub>3</sub> OD) spectrum for calcaridine C (4).....                                 | 14 |
| <b>Figure S20:</b> <sup>1</sup> H- <sup>1</sup> H COSY NMR (600 MHz) spectrum for calcaridine C (4) .....                                | 14 |
| <b>Figure S21:</b> <sup>1</sup> H- <sup>13</sup> C HSQC NMR (600 MHz) spectrum for calcaridine C (4).....                                | 15 |
| <b>Figure S22:</b> <sup>1</sup> H- <sup>13</sup> C HMBC NMR (600 MHz) spectrum for calcaridine C (4).....                                | 15 |
| <b>Figure S23:</b> <sup>1</sup> H- <sup>1</sup> H NOESY NMR (600 MHz) spectrum for calcaridine C (4) .....                               | 16 |
| <b>Figure S24:</b> HRESIMS spectrum for naamine H (5) .....                                                                              | 16 |
| <b>Figure S25:</b> <sup>1</sup> H NMR (600 MHz, CD <sub>3</sub> OD) spectrum for naamine H (5).....                                      | 17 |
| <b>Figure S26:</b> <sup>1</sup> H- <sup>13</sup> C HSQC NMR (600 MHz) spectrum for naamine H (5) .....                                   | 18 |
| <b>Figure S27:</b> <sup>1</sup> H- <sup>13</sup> C HMBC NMR (600 MHz) spectrum for naamine H (5) .....                                   | 18 |
| <b>Figure S28:</b> <sup>1</sup> H- <sup>1</sup> H NOESY NMR (600 MHz) spectrum for naamine H (5).....                                    | 19 |
| <b>Figure S29:</b> HRESIMS spectrum for naamidine J (6).....                                                                             | 19 |
| <b>Figure S30:</b> <sup>1</sup> H NMR (600 MHz, CD <sub>3</sub> OD) spectrum for naamidine J (6) .....                                   | 20 |
| <b>Figure S31:</b> <sup>13</sup> C NMR (125 MHz, CD <sub>3</sub> OD) spectrum for naamidine J (6) .....                                  | 20 |
| <b>Figure S32:</b> <sup>1</sup> H- <sup>1</sup> H COSY NMR (600 MHz) spectrum for naamidine J (6).....                                   | 21 |
| <b>Figure S33:</b> <sup>1</sup> H- <sup>13</sup> C HSQC NMR (600 MHz) spectrum for naamidine J (6).....                                  | 21 |
| <b>Figure S34:</b> <sup>1</sup> H- <sup>13</sup> C HMBC NMR (600 MHz) spectrum for naamidine J (6).....                                  | 22 |
| <b>Figure S35:</b> <sup>1</sup> H- <sup>1</sup> H NOESY NMR (600 MHz) spectrum for naamidine J (6) .....                                 | 22 |
| <b>Figure S36:</b> HRESIMS spectrum for naamine I (7) .....                                                                              | 23 |
| <b>Figure S37:</b> HRESIMS spectrum for naamidine K (8) .....                                                                            | 23 |
| <b>Figure S38:</b> <sup>1</sup> H NMR (600 MHz, CD <sub>3</sub> OD) spectrum for mixture of naamine I (7) and naamidine K (8) .....      | 24 |
| <b>Figure S39:</b> <sup>1</sup> H- <sup>13</sup> C HSQC NMR (600 MHz) spectrum for mixture of naamine I (7) and naamidine K (8) .....    | 24 |
| <b>Figure S40:</b> <sup>1</sup> H- <sup>13</sup> C HMBC NMR (600 MHz) spectrum for mixture of naamine I (7) and naamidine K (8) .....    | 25 |
| <b>Figure S41:</b> <sup>1</sup> H NMR (600 MHz, CD <sub>3</sub> OD) spectrum for thymidine (9).....                                      | 25 |
| <b>Figure S42:</b> <sup>13</sup> C NMR (125 MHz, CD <sub>3</sub> OD) spectrum for thymidine (9) .....                                    | 26 |
| <b>Figure S43:</b> <sup>1</sup> H- <sup>1</sup> H COSY NMR (600 MHz) spectrum for thymidine (9).....                                     | 26 |
| <b>Figure S44:</b> <sup>1</sup> H- <sup>13</sup> C HSQC NMR (600 MHz) spectrum for thymidine (9) .....                                   | 27 |
| <b>Figure S45:</b> <sup>1</sup> H- <sup>13</sup> C HMBC NMR (600 MHz) spectrum for thymidine (9) .....                                   | 27 |
| <b>Figure S46:</b> MS/MS spectra of the isolated compounds were deposited in the GNPS spectral libraries under following identifier..... | 28 |
| <b>Figure S47:</b> MS/MS spectrum of ernstine A (1).....                                                                                 | 28 |
| <b>Figure S48:</b> MS/MS spectrum of Phorbatopsin D (2) .....                                                                            | 28 |

## Supporting information

|                                                             |    |
|-------------------------------------------------------------|----|
| <b>Figure S49:</b> MS/MS spectrum of Phorbatopsin E(3)..... | 29 |
| <b>Figure S50:</b> MS/MS spectrum of Naamine H (5) .....    | 29 |
| <b>Figure S51:</b> MS/MS spectrum of Naamine I (7) .....    | 29 |
| <b>Figure S52:</b> MS/MS spectrum of Naamidine J (6).....   | 30 |
| <b>Figure S53:</b> MS/MS spectrum of Naamidine K (8) .....  | 30 |
| <b>Figure S54:</b> MS/MS spectrum of Calcaridine C (4)..... | 30 |

*In situ* *Ernsta naturalis* Photo

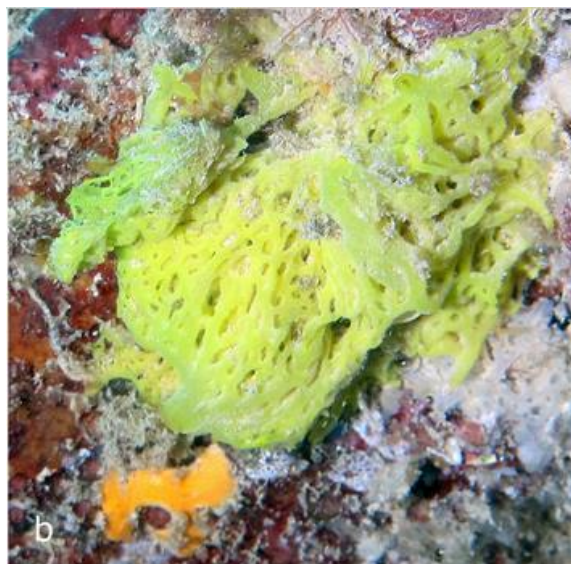

## Supporting information

**Figure S1:** HRESIMS spectrum for ernstine A (1)

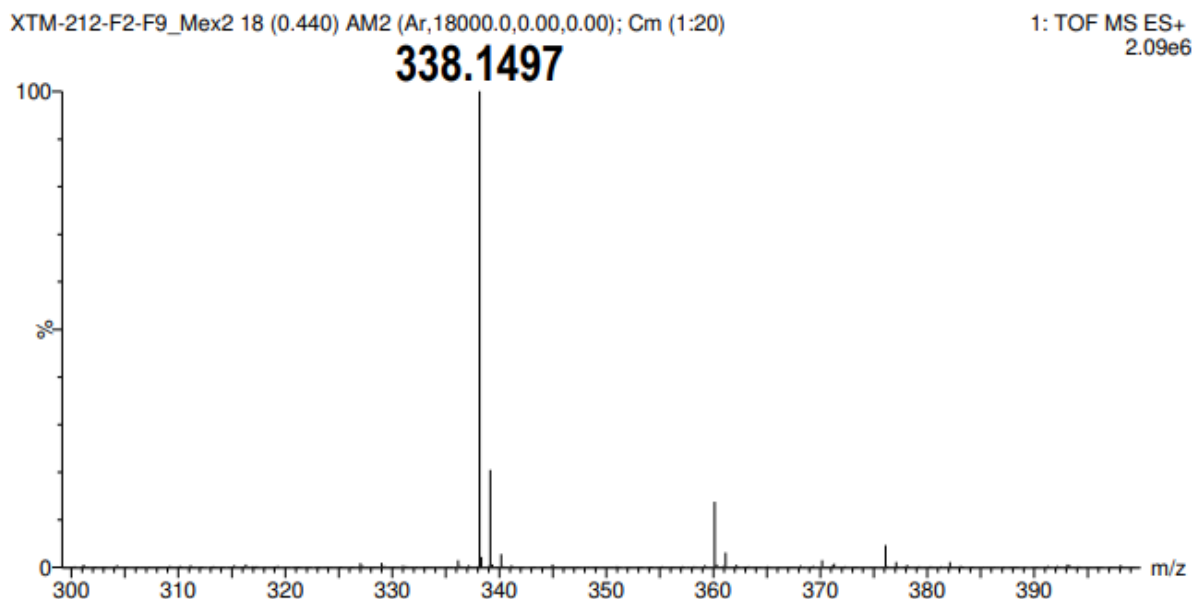

**Figure S2:**  $^1\text{H}$  NMR (600 MHz,  $\text{CD}_3\text{OD}$ ) spectrum for ernstine A (1)

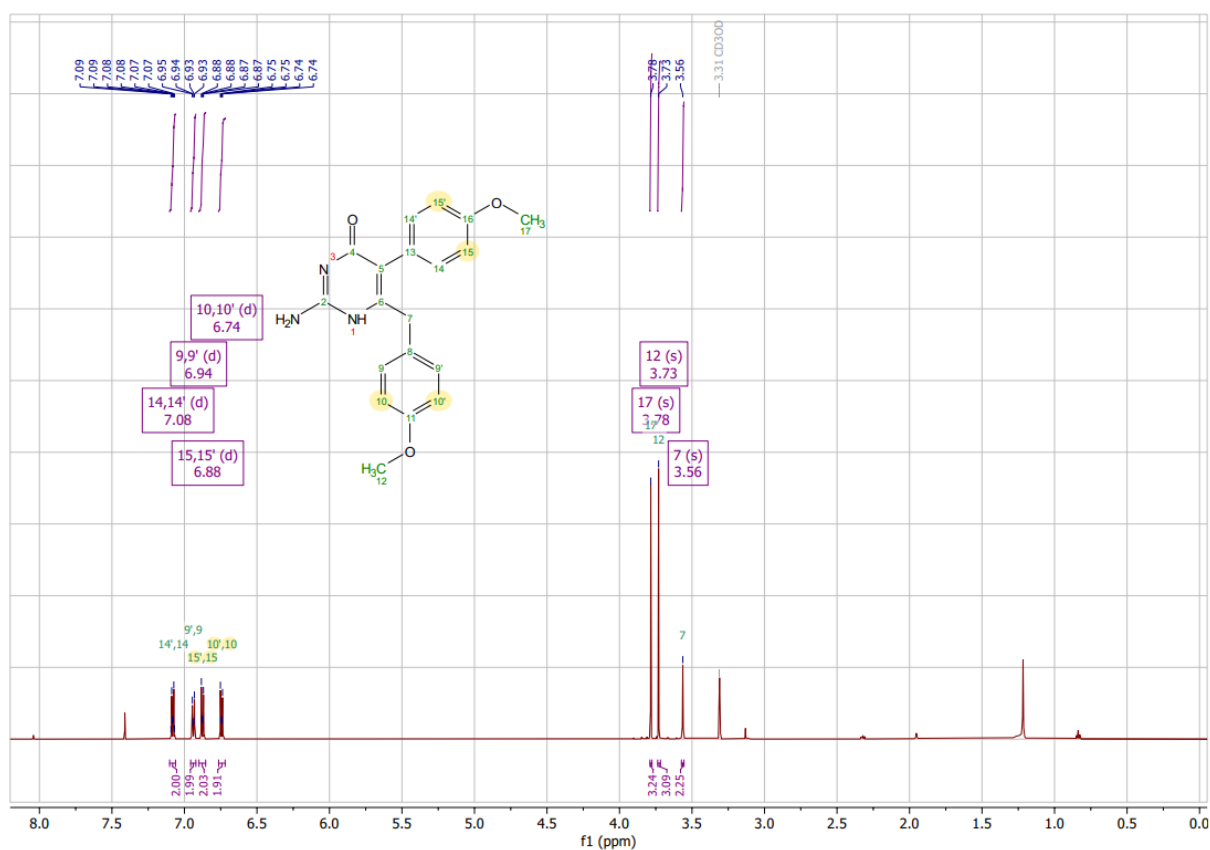

# Supporting information

**Figure S3:**  $^1\text{H}$ - $^1\text{H}$  COSY NMR (600 MHz) spectrum for ernstine A (1)

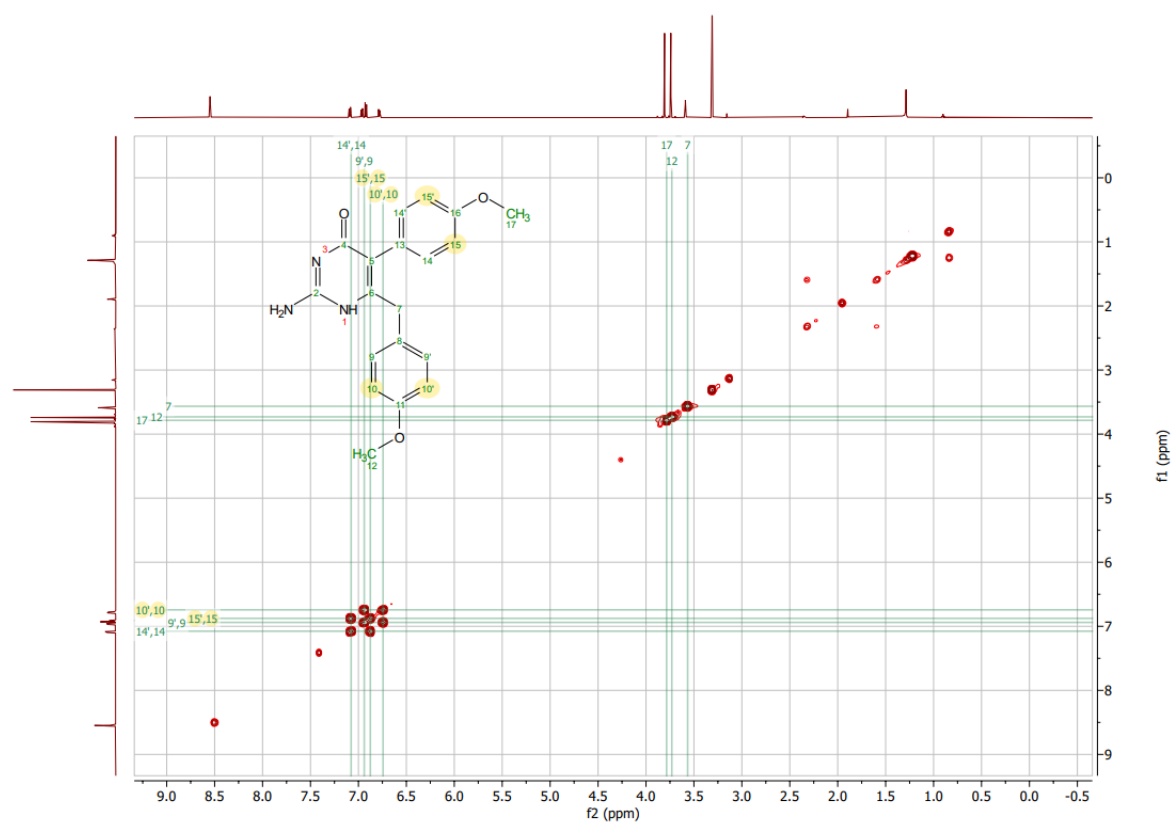

**Figure S4:**  $^1\text{H}$ - $^{13}\text{C}$  HSQC NMR (600 MHz) spectrum for ernstine A (1)

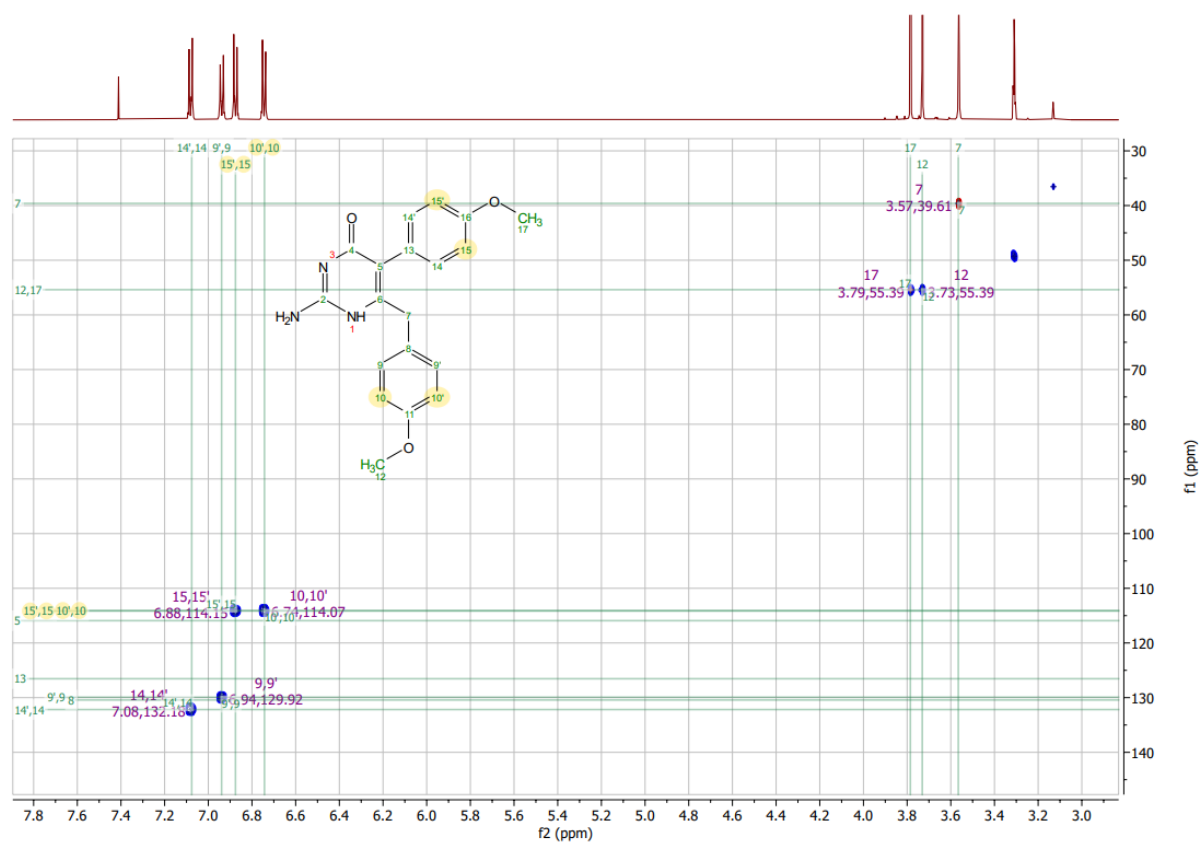

# Supporting information

**Figure S5:**  $^1\text{H}$ - $^{13}\text{C}$  HMBC NMR (600 MHz) spectrum for ernstine A (1)

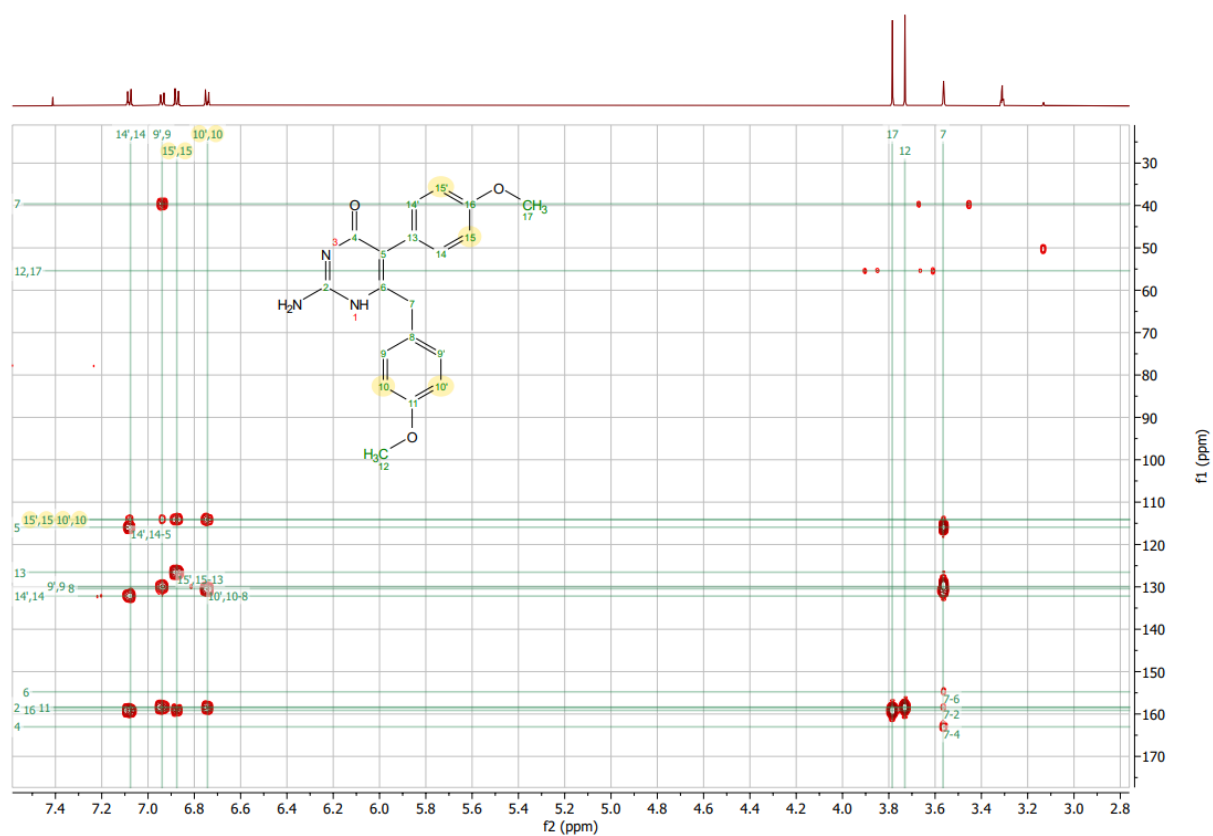

# Supporting information

**Figure S6:**  $^1\text{H}$ - $^1\text{H}$  NOESY NMR (600 MHz) spectrum for ernstine A (1)

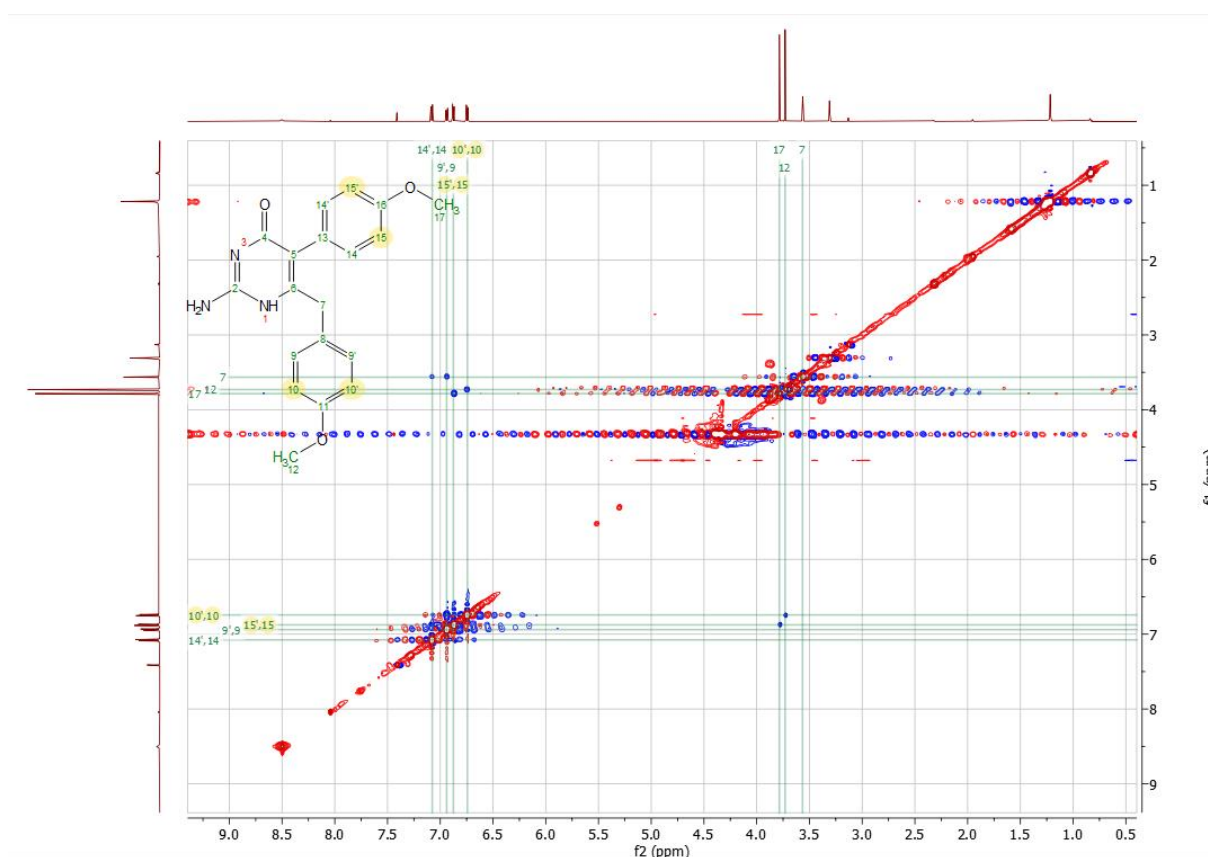

# Supporting information

**Figure S8:**  $^1\text{H}$  NMR (600 MHz,  $\text{CD}_3\text{OD}$ ) spectrum for phorbatopsin D (2)

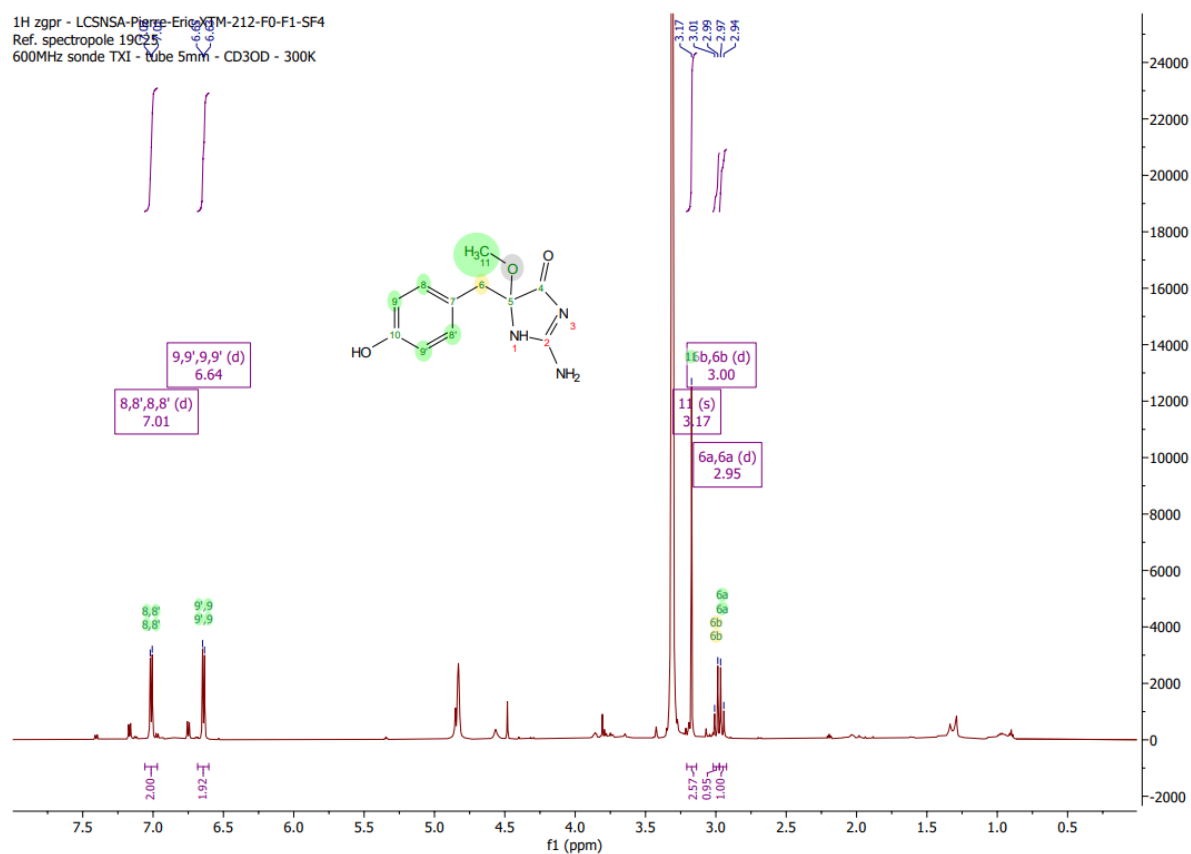

**Figure S9:**  $^{13}\text{C}$  NMR (125 MHz,  $\text{CD}_3\text{OD}$ ) spectrum for phorbatopsin D (2)

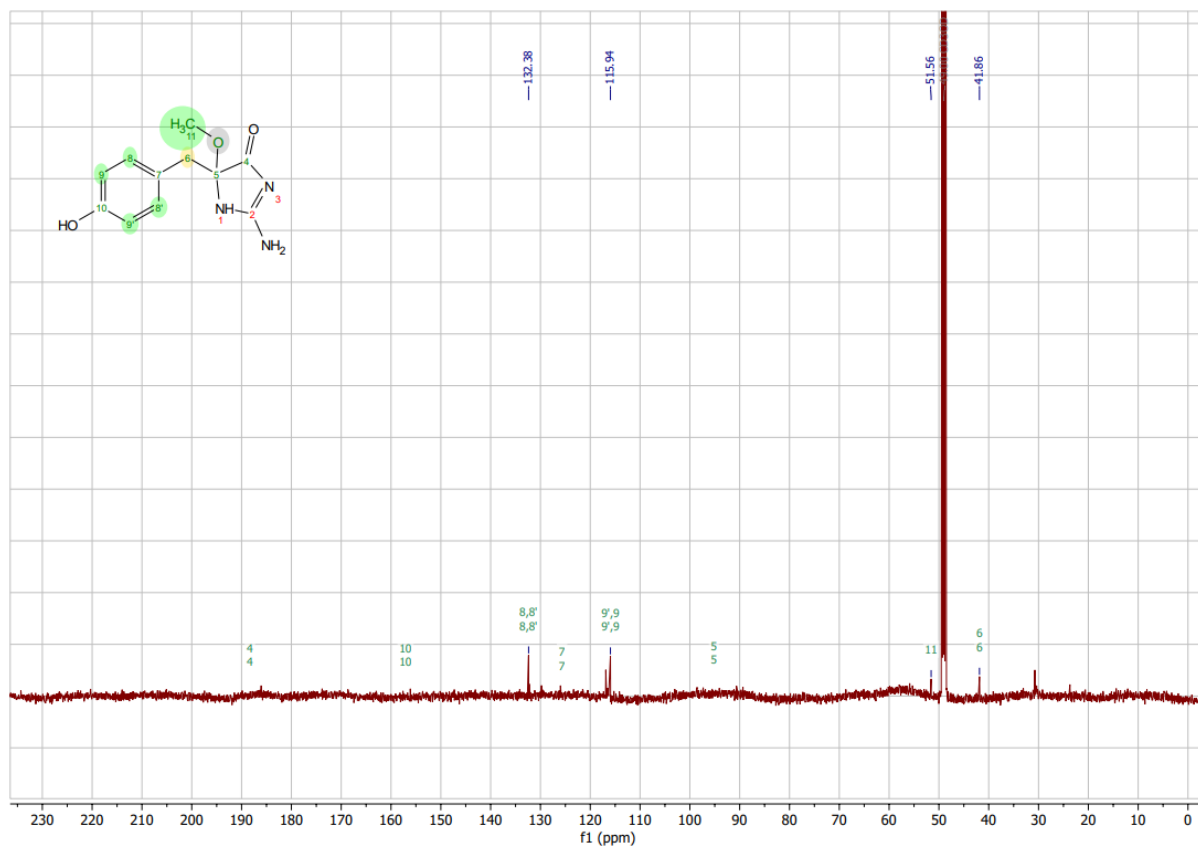



# Supporting information

**Figure S10:**  $^1\text{H}$ - $^{13}\text{C}$  HSQC NMR (600 MHz) spectrum for phorbatopsin D (2)

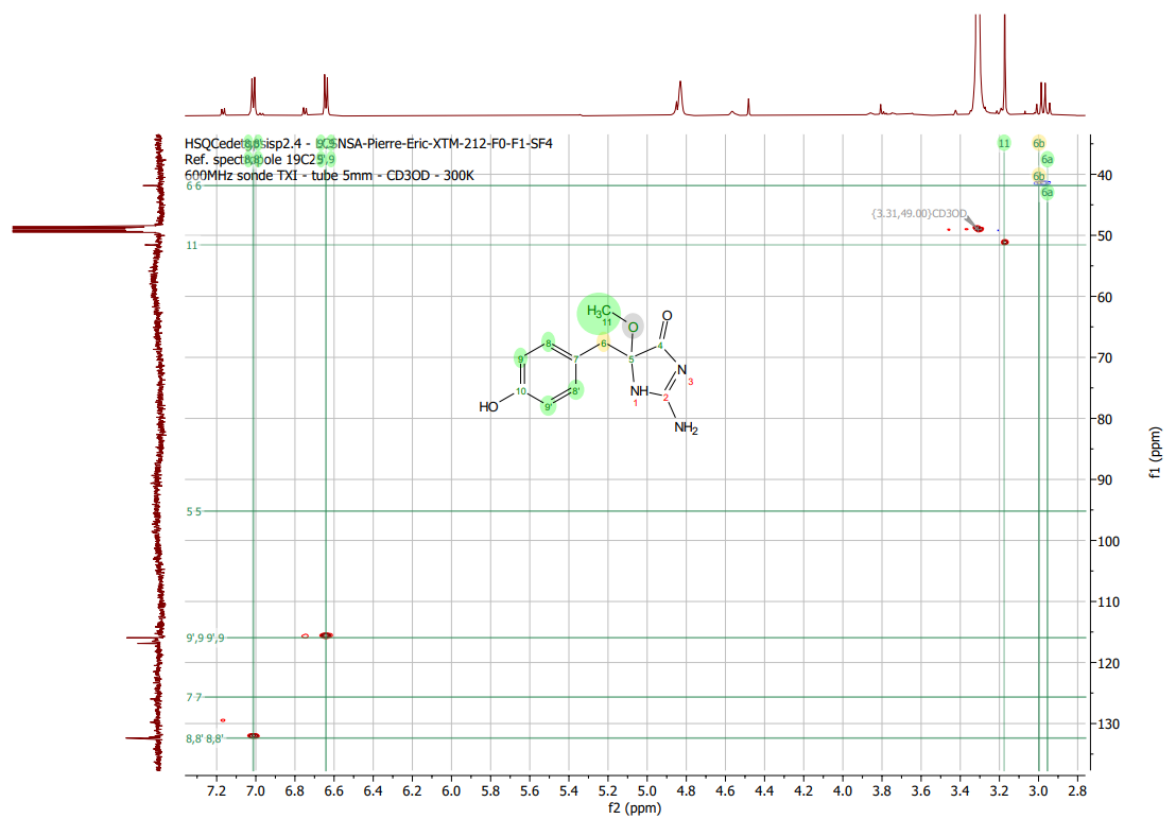

**Figure S11:**  $^1\text{H}$ - $^{13}\text{C}$  HMBC NMR (600 MHz) spectrum for phorbatopsin D (2)

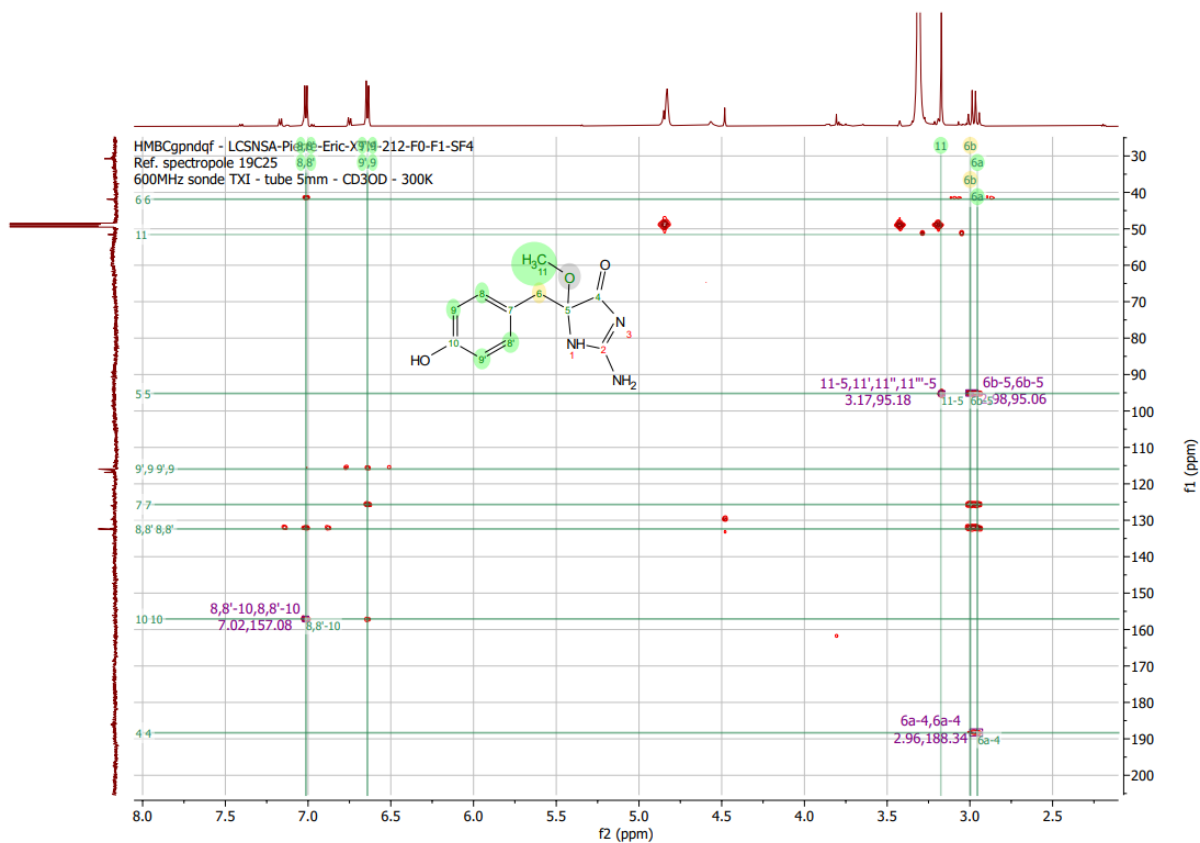

# Supporting information

**Figure S12:** HRESIMS spectrum for phorbatopsin E (3)

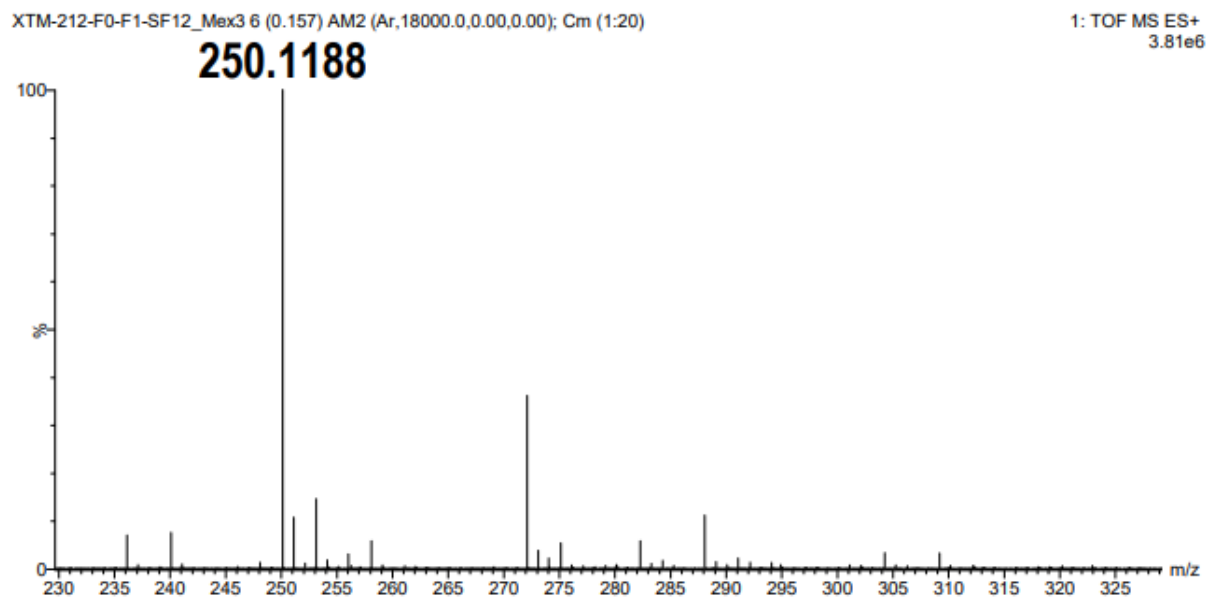

**Figure S13:**  $^1\text{H}$  NMR (600 MHz,  $\text{CD}_3\text{OD}$ ) spectrum for phorbatopsin E (3)

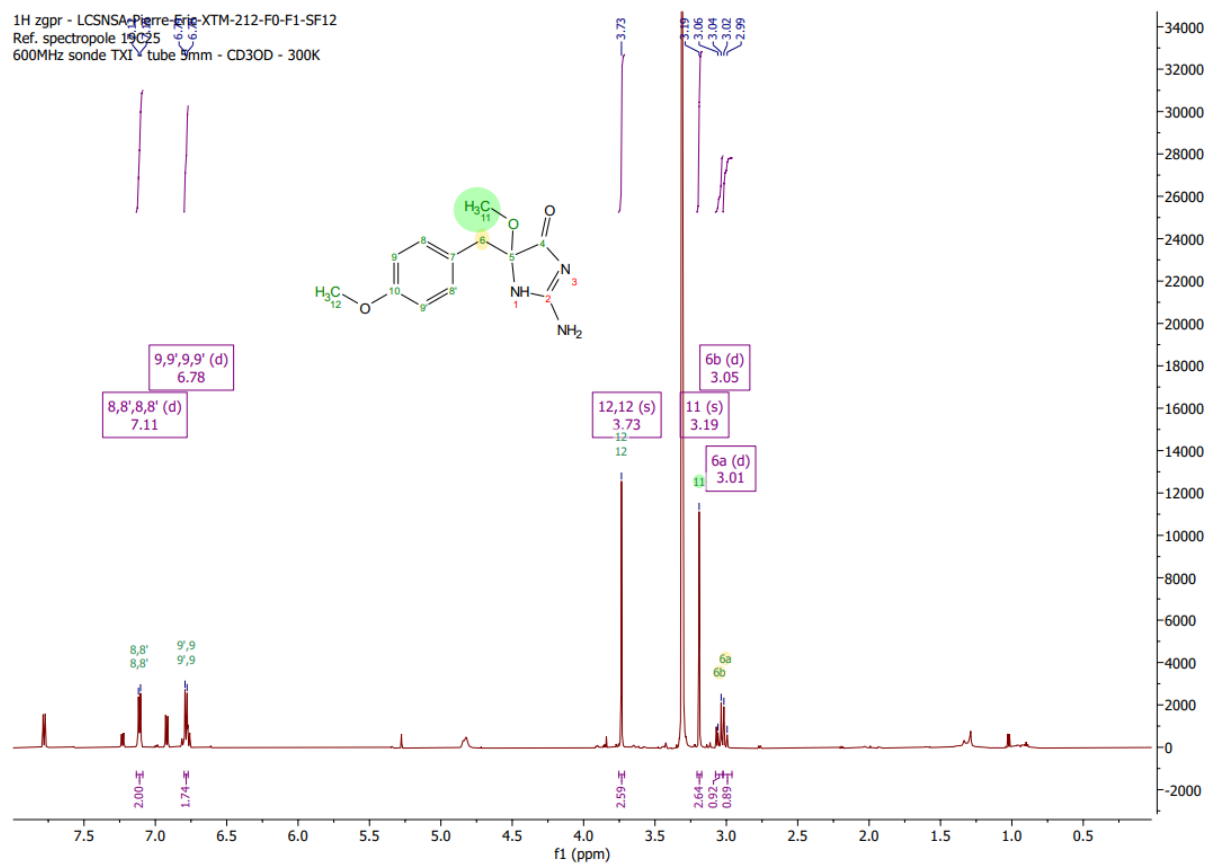

# Supporting information

**Figure S14:**  $^1\text{H}$ - $^{13}\text{C}$  HSQC NMR (600 MHz) spectrum for phorbatopsin E (3)

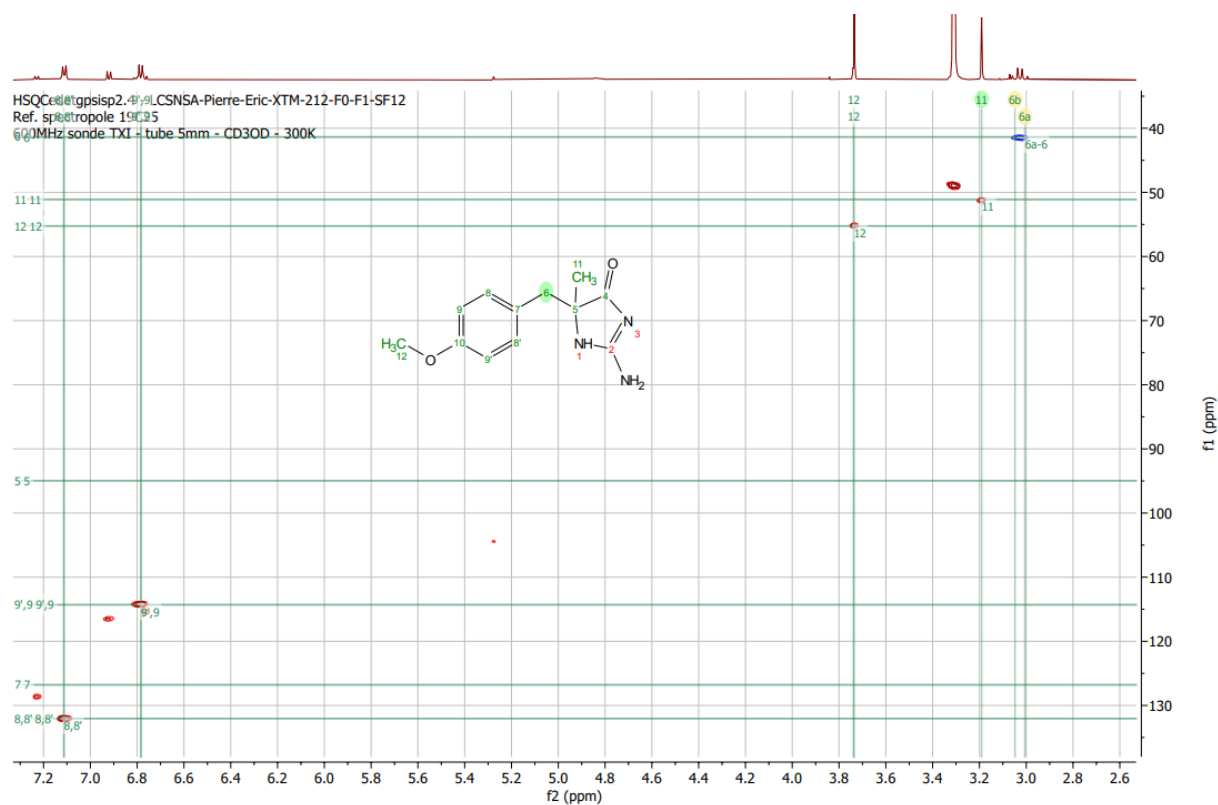

**Figure S15:**  $^1\text{H}$ - $^{13}\text{C}$  HMBC NMR (600 MHz) spectrum for phorbatopsin E (3)

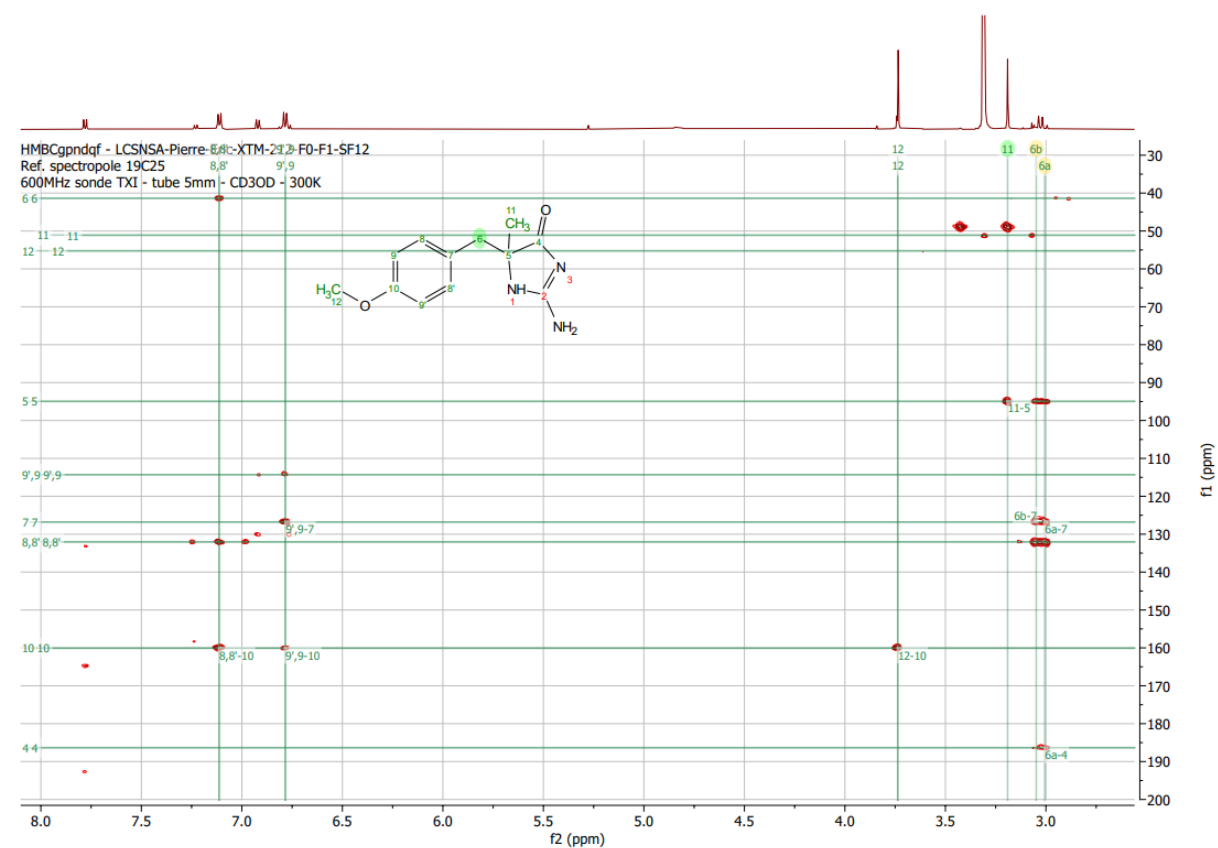

## Supporting information

**Figure S16:**  $^1\text{H}$ - $^1\text{H}$  NOESY NMR (600 MHz) spectrum for phorbatopsin E (3)

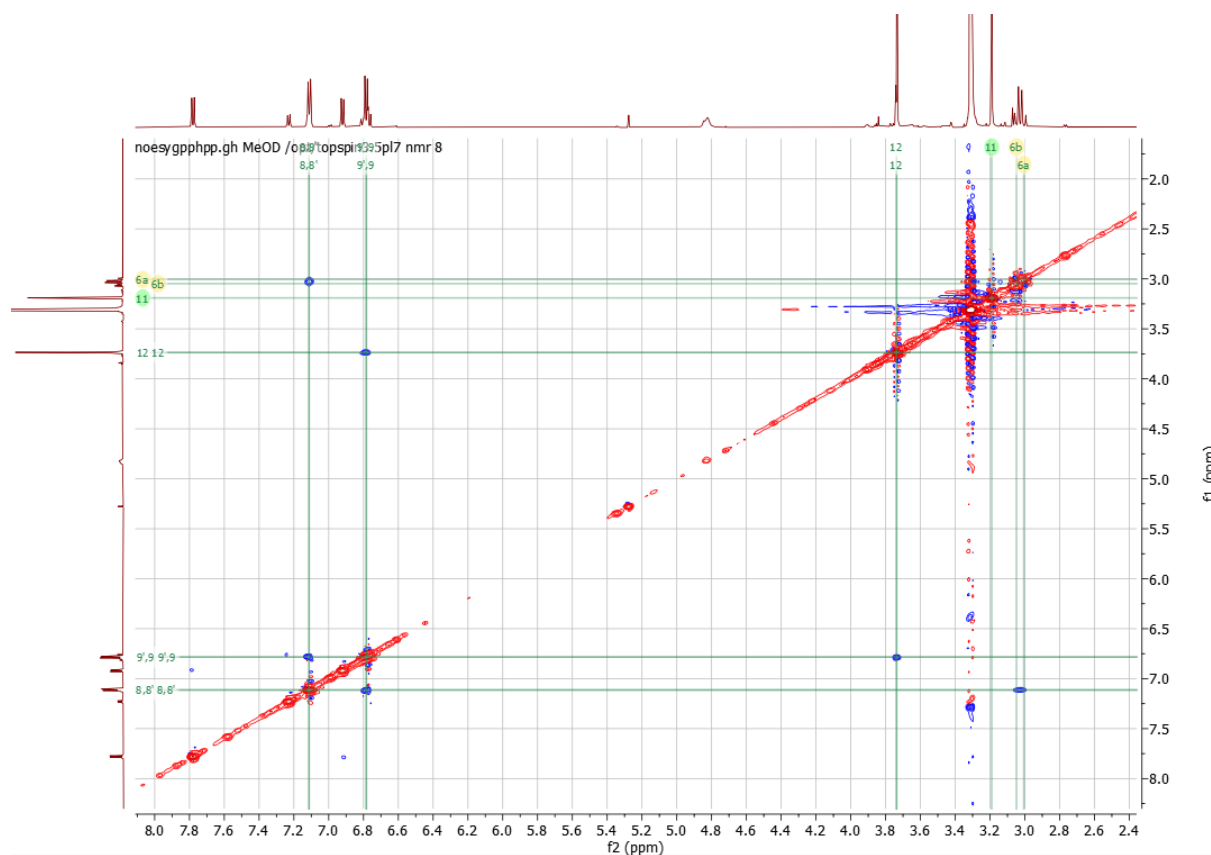

**Figure S17:** HRESIMS spectrum for calcaridine C (4)

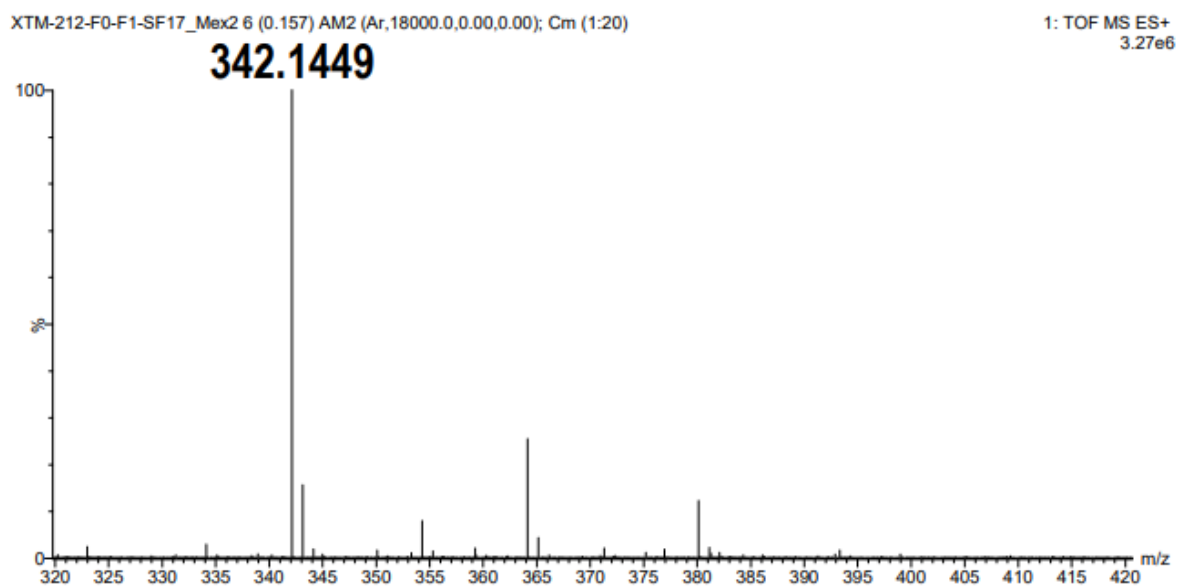

# Supporting information

**Figure S18:**  $^1\text{H}$  NMR (600 MHz,  $\text{CD}_3\text{OD}$ ) spectrum for calcaridine C (4)

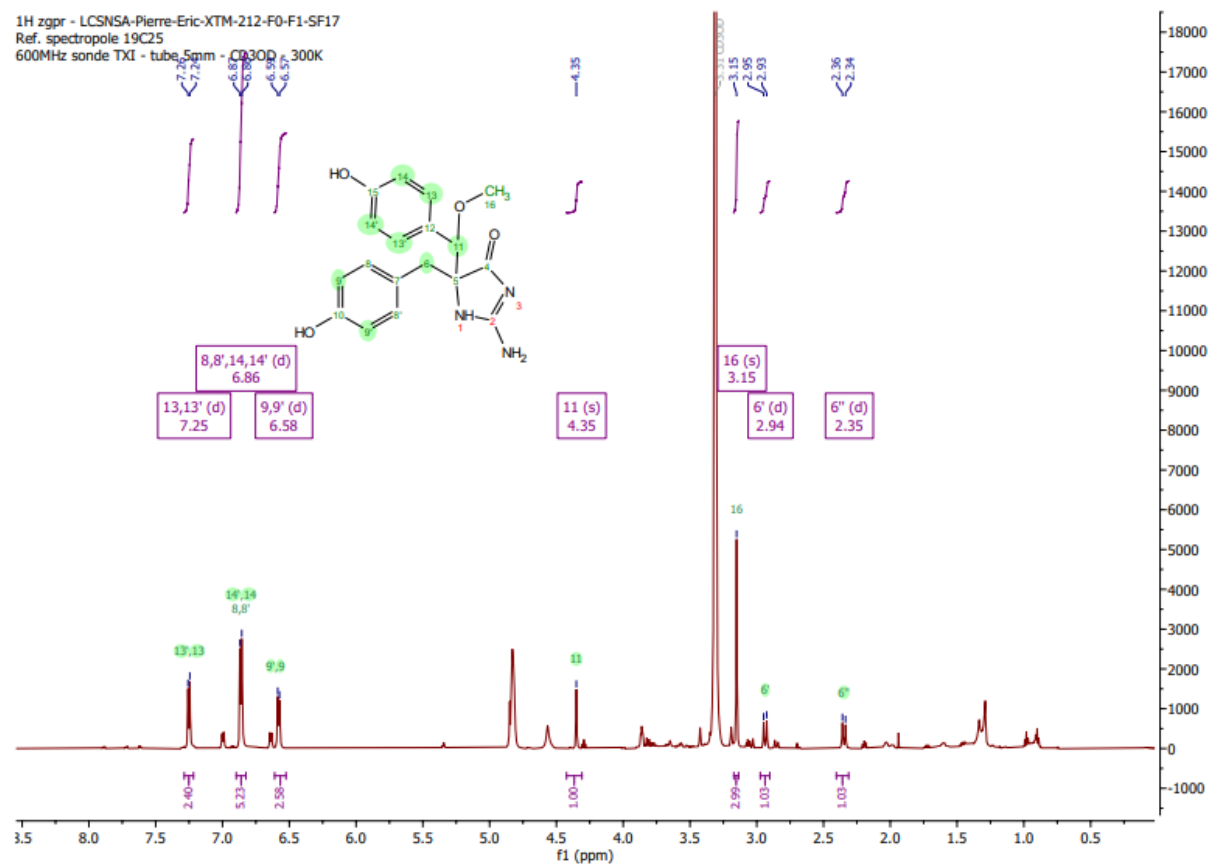

# Supporting information

**Figure S19:**  $^{13}\text{C}$  NMR (125 MHz,  $\text{CD}_3\text{OD}$ ) spectrum for calcaridine C (4)

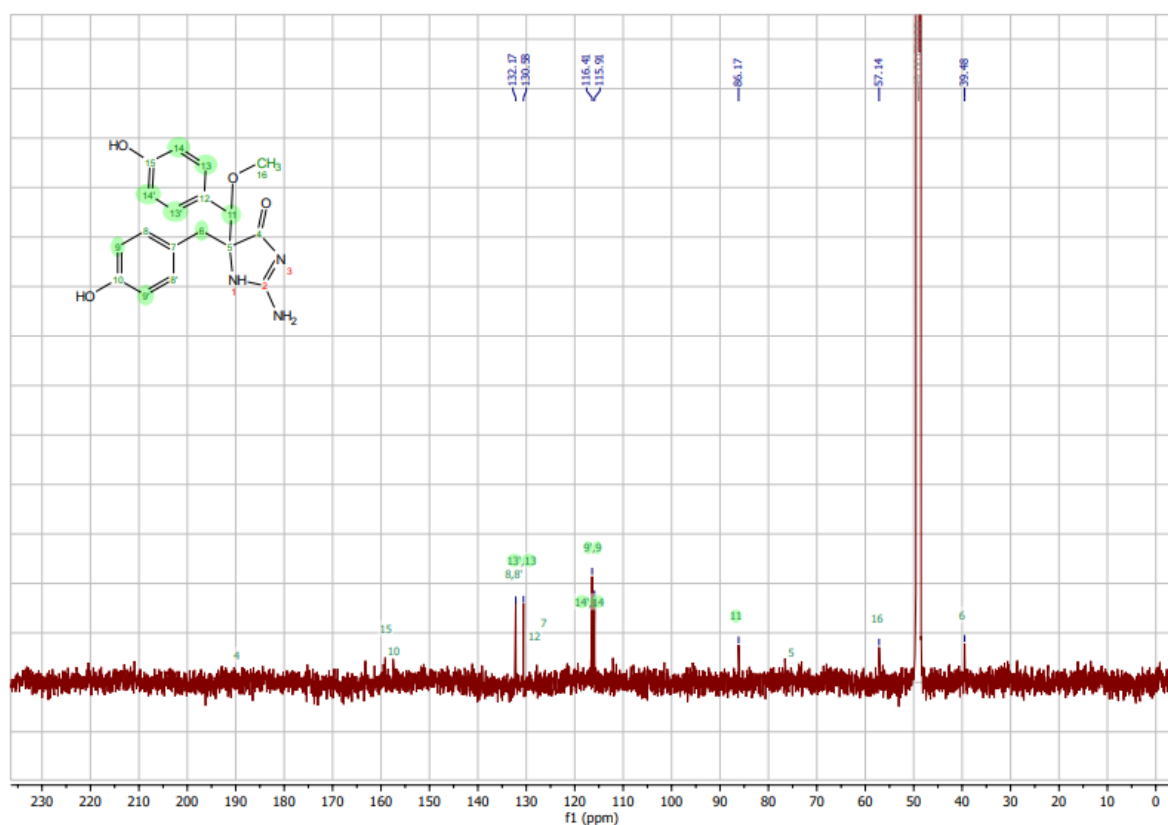

**Figure S20:**  $^1\text{H}$ - $^1\text{H}$  COSY NMR (600 MHz) spectrum for calcaridine C (4)

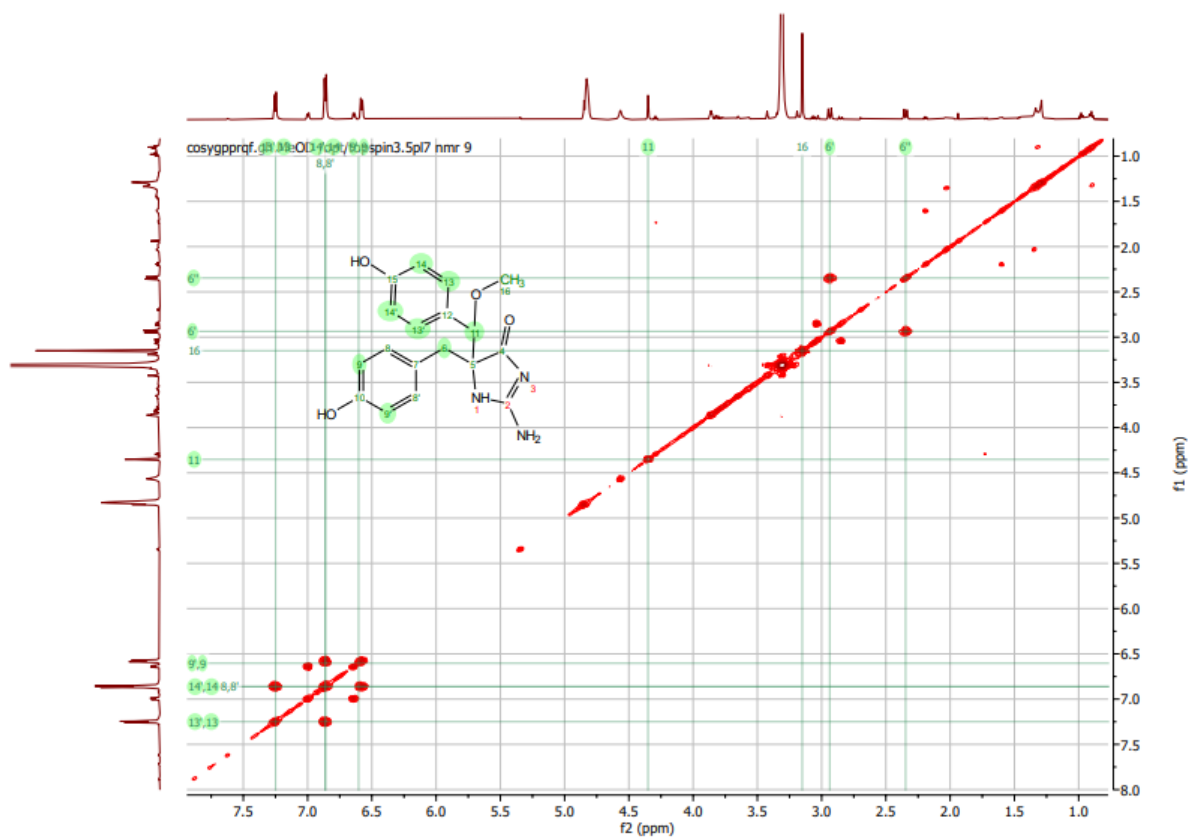

## Supporting information

**Figure S21:**  $^1\text{H}$ - $^{13}\text{C}$  HSQC NMR (600 MHz) spectrum for calcaridine C (4)

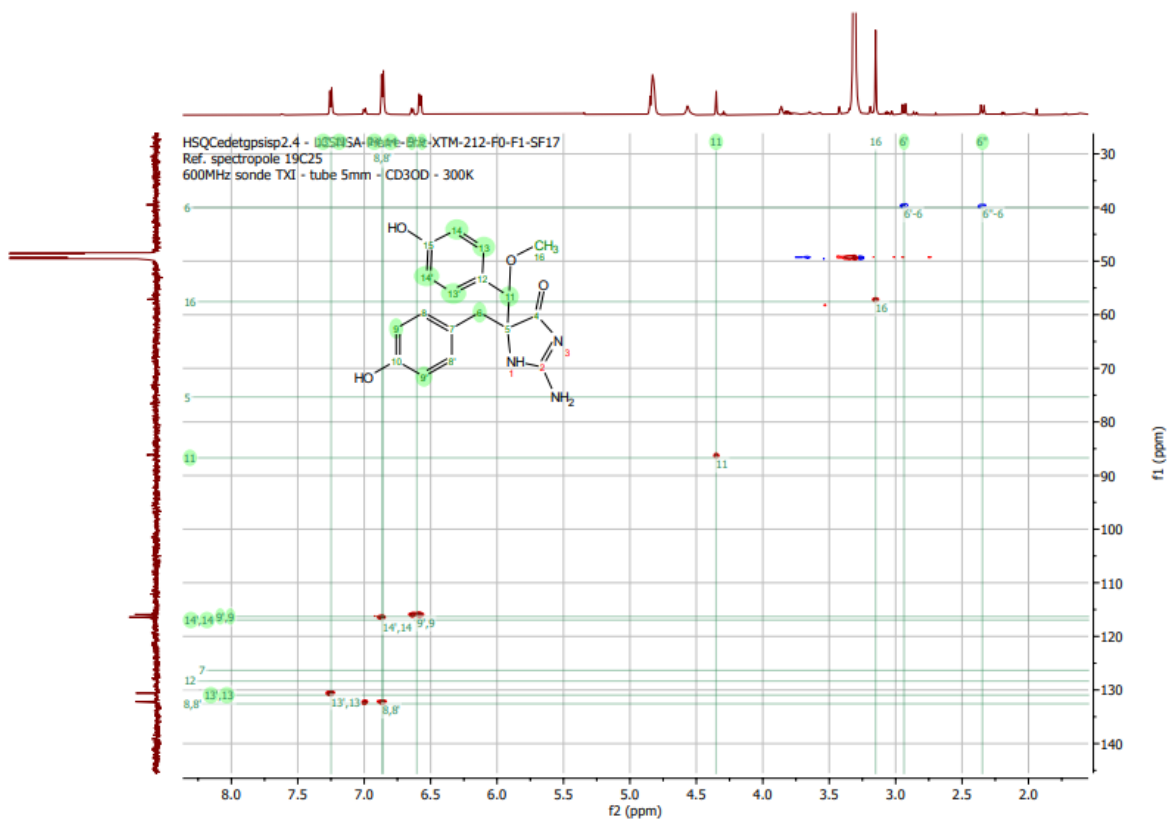

**Figure S22:**  $^1\text{H}$ - $^{13}\text{C}$  HMBC NMR (600 MHz) spectrum for calcaridine C (4)

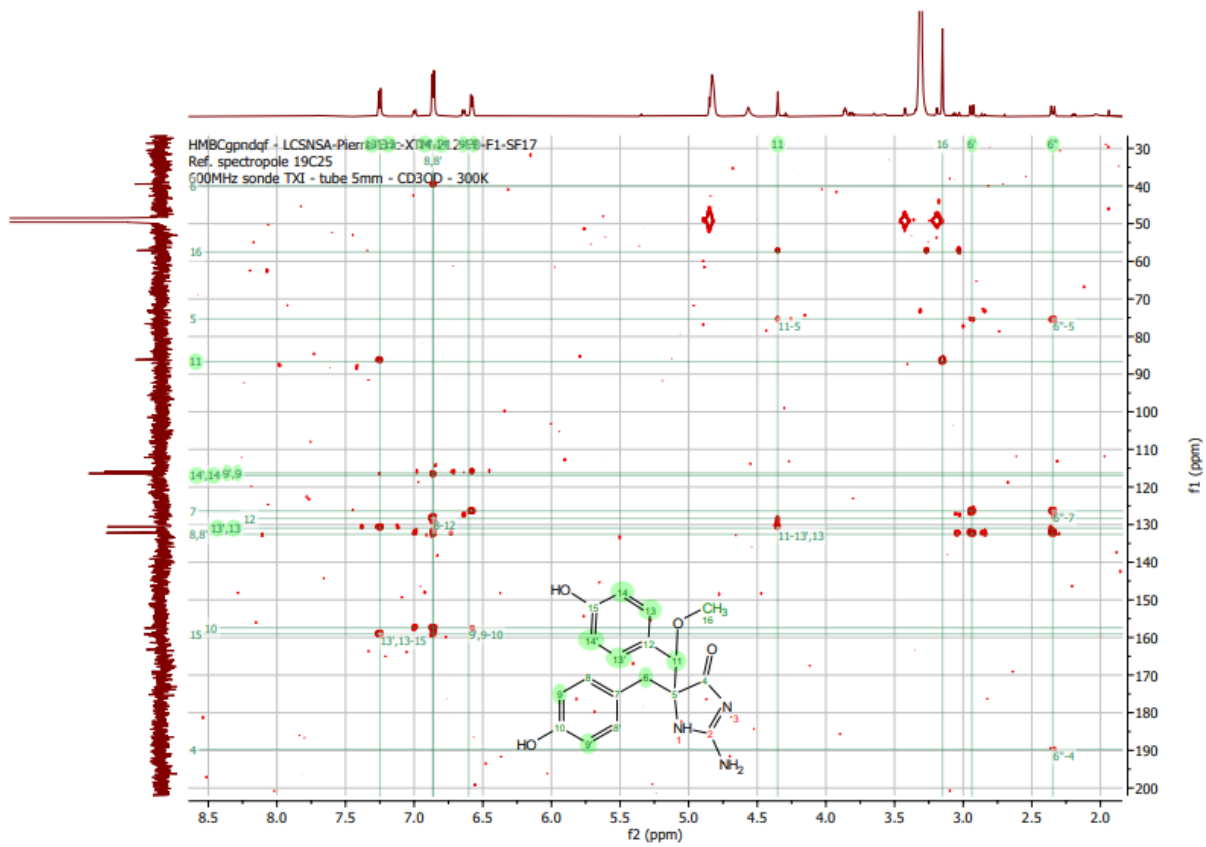

## Supporting information

**Figure S23:**  $^1\text{H}$ - $^1\text{H}$  NOESY NMR (600 MHz) spectrum for calcaridine C (4)

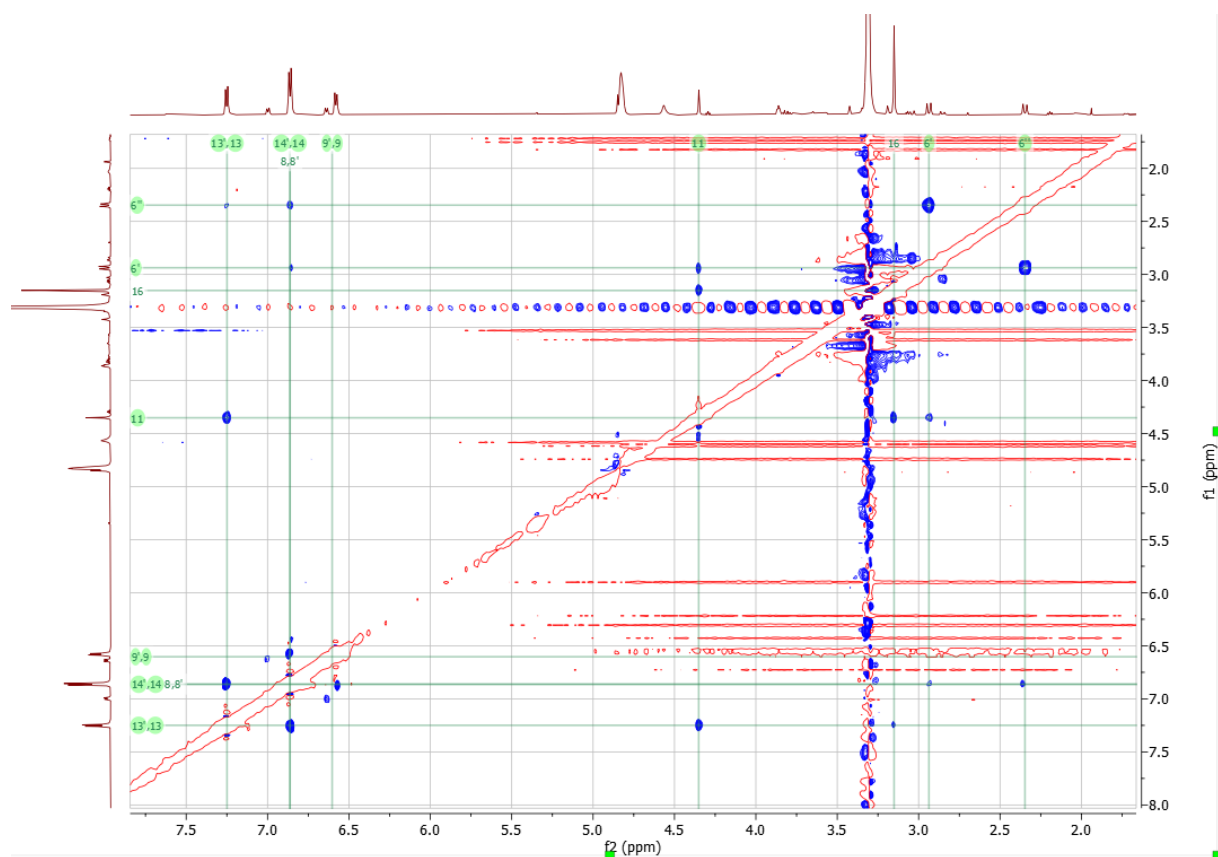

**Figure S24:** HRESIMS spectrum for naamine H (5)

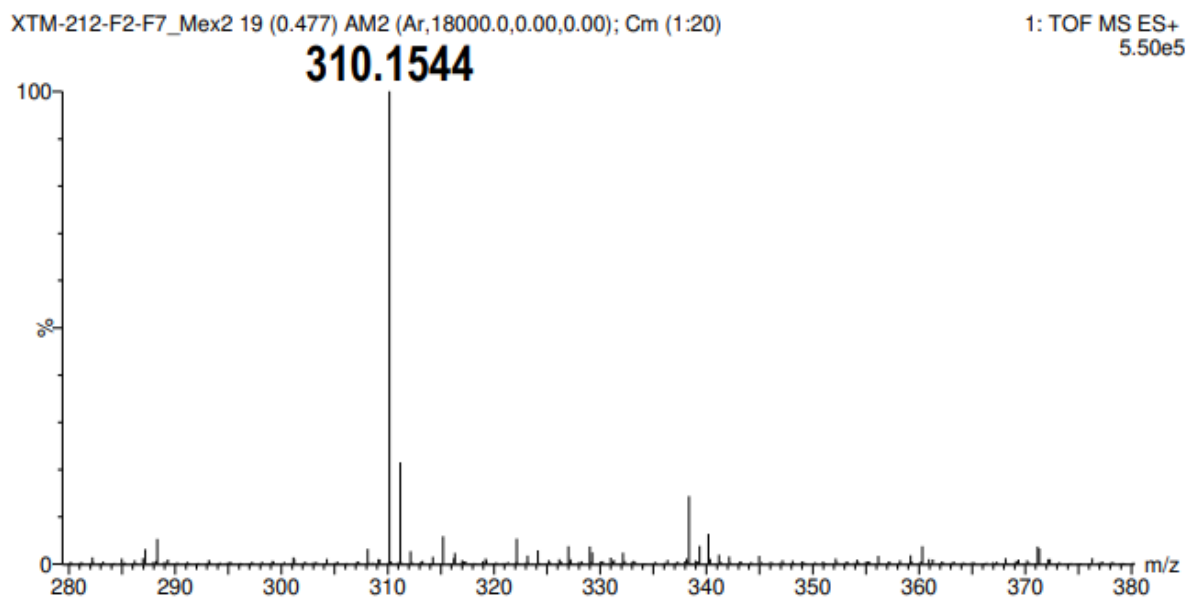



## Supporting information

Figure S25:  $^1\text{H}$  NMR (600 MHz,  $\text{CD}_3\text{OD}$ ) spectrum for naamine H (5)

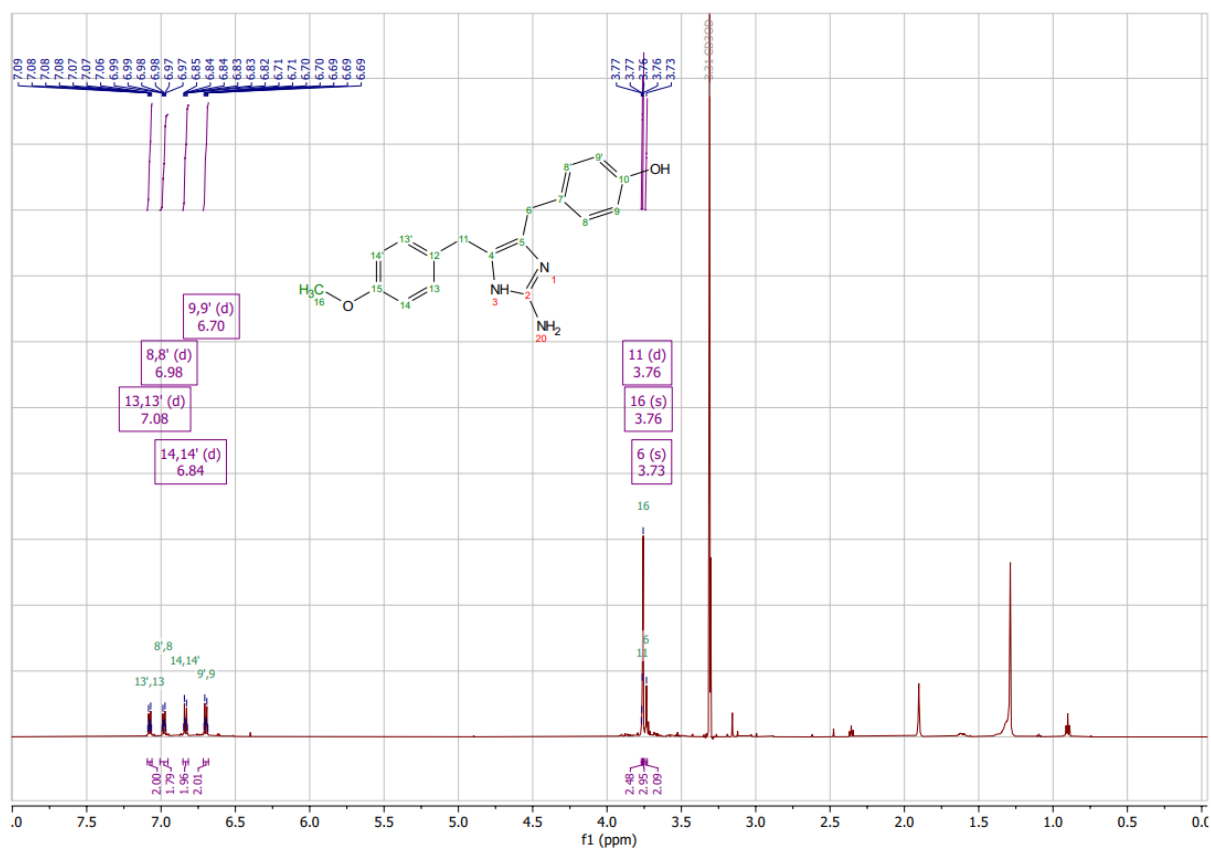

## Supporting information

**Figure S26:**  $^1\text{H}$ - $^{13}\text{C}$  HSQC NMR (600 MHz) spectrum for naamine H (5)

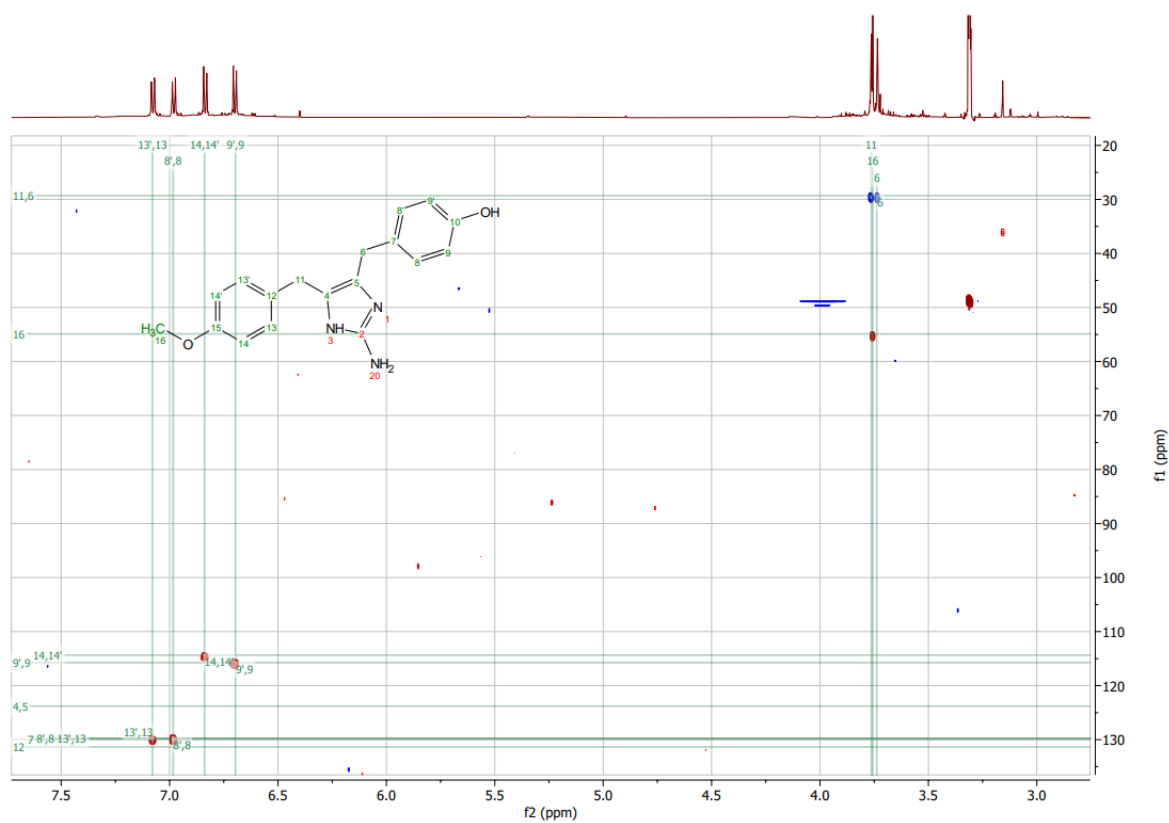

**Figure S27:**  $^1\text{H}$ - $^{13}\text{C}$  HMBC NMR (600 MHz) spectrum for naamine H (5)

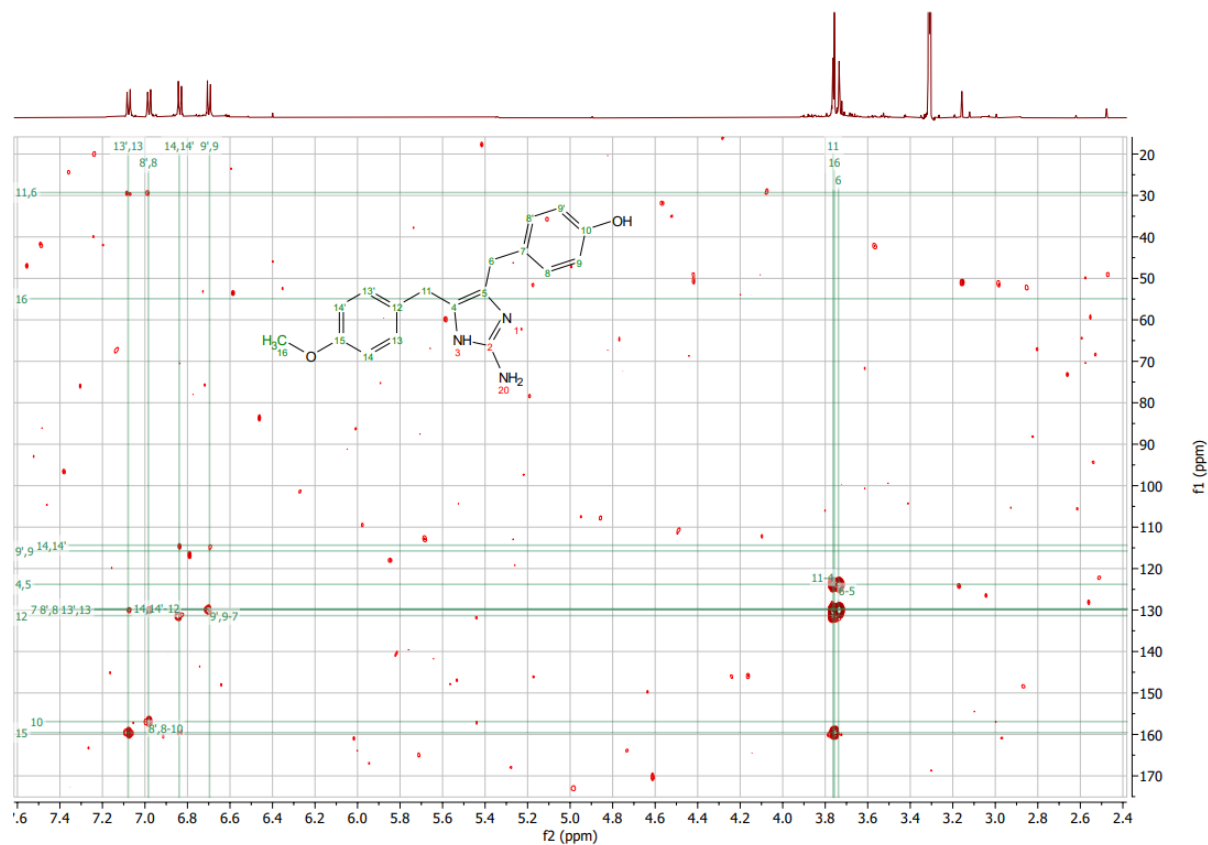

## Supporting information

**Figure S28:**  $^1\text{H}$ - $^1\text{H}$  NOESY NMR (600 MHz) spectrum for naamine H (5)

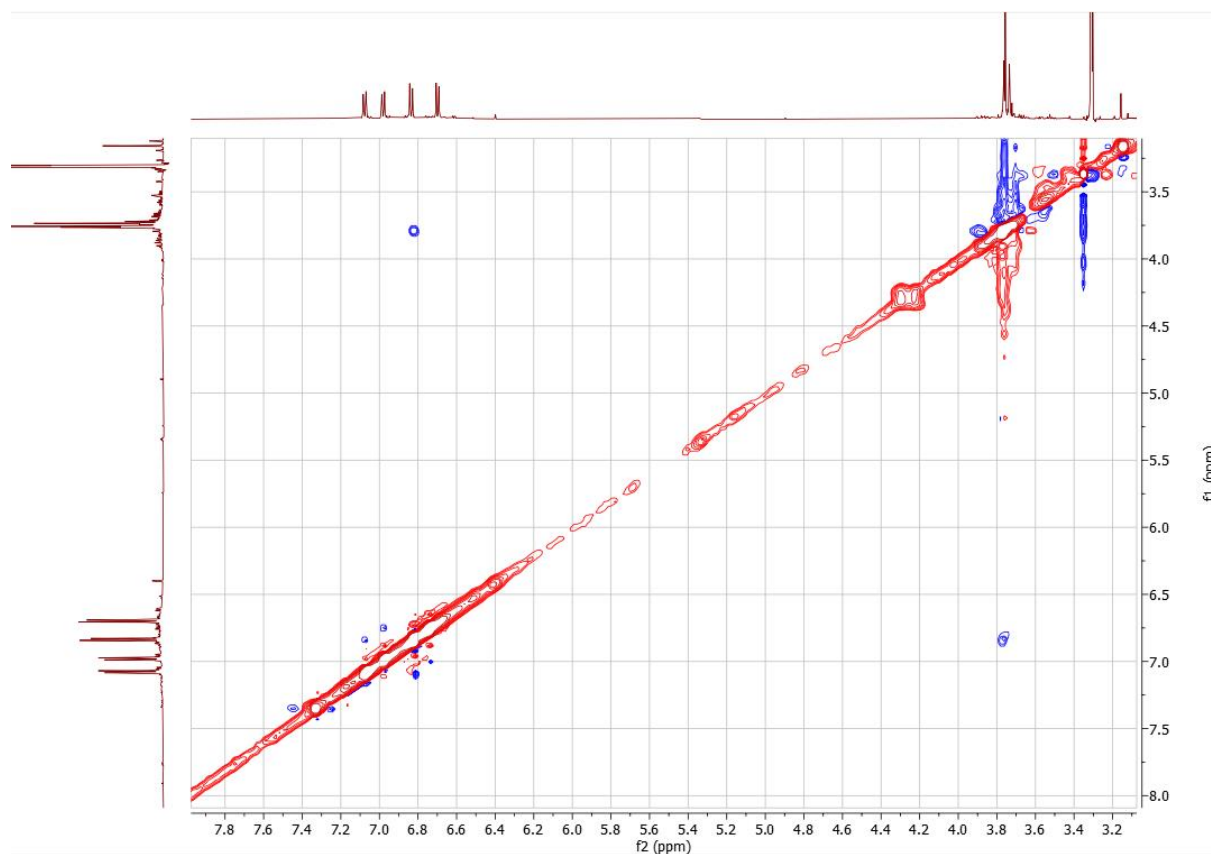

**Figure S29:** HRESIMS spectrum for naamidine J (6)

XTM-212-F2-F11\_Mex2 16 (0.406) AM2 (Ar,18000.0,0.00,0.00); Cm (1:20)

1: TOF MS ES+  
1.14e6

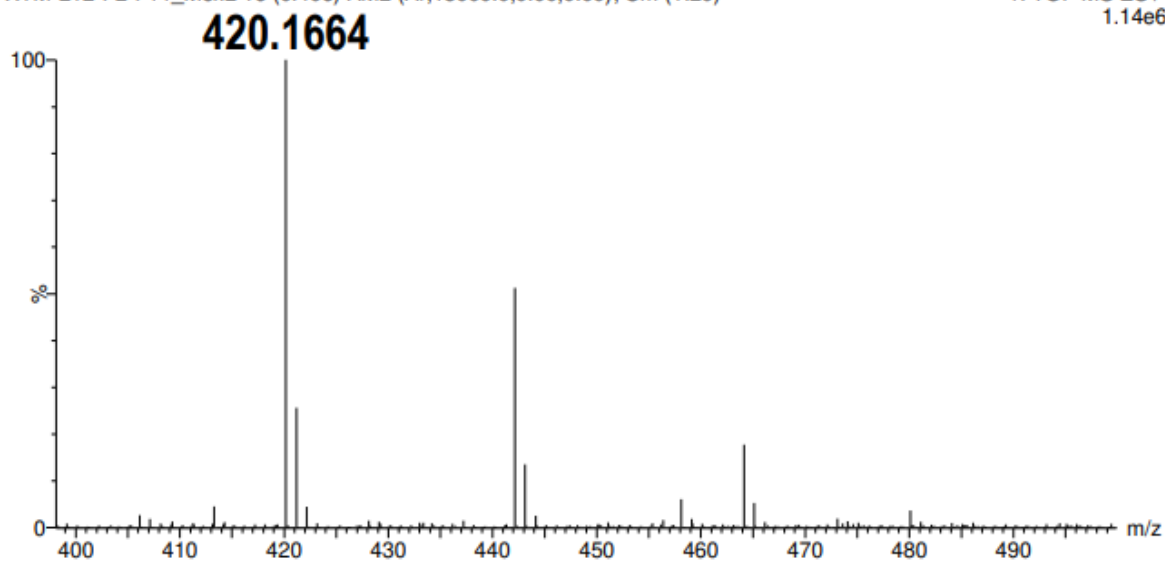

# Supporting information

**Figure S30:**  $^1\text{H}$  NMR (600 MHz,  $\text{CD}_3\text{OD}$ ) spectrum for naamidine J (6)

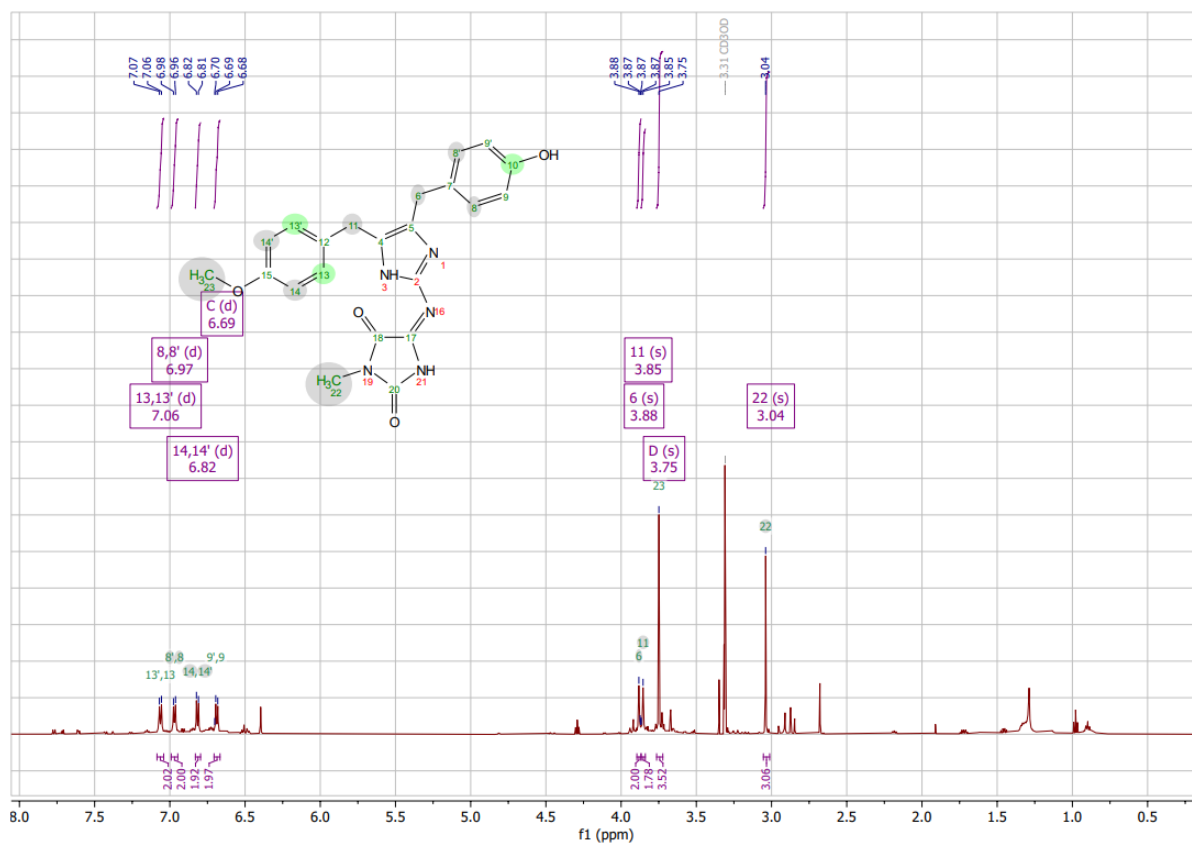

**Figure S31:**  $^{13}\text{C}$  NMR (125 MHz,  $\text{CD}_3\text{OD}$ ) spectrum for naamidine J (6)

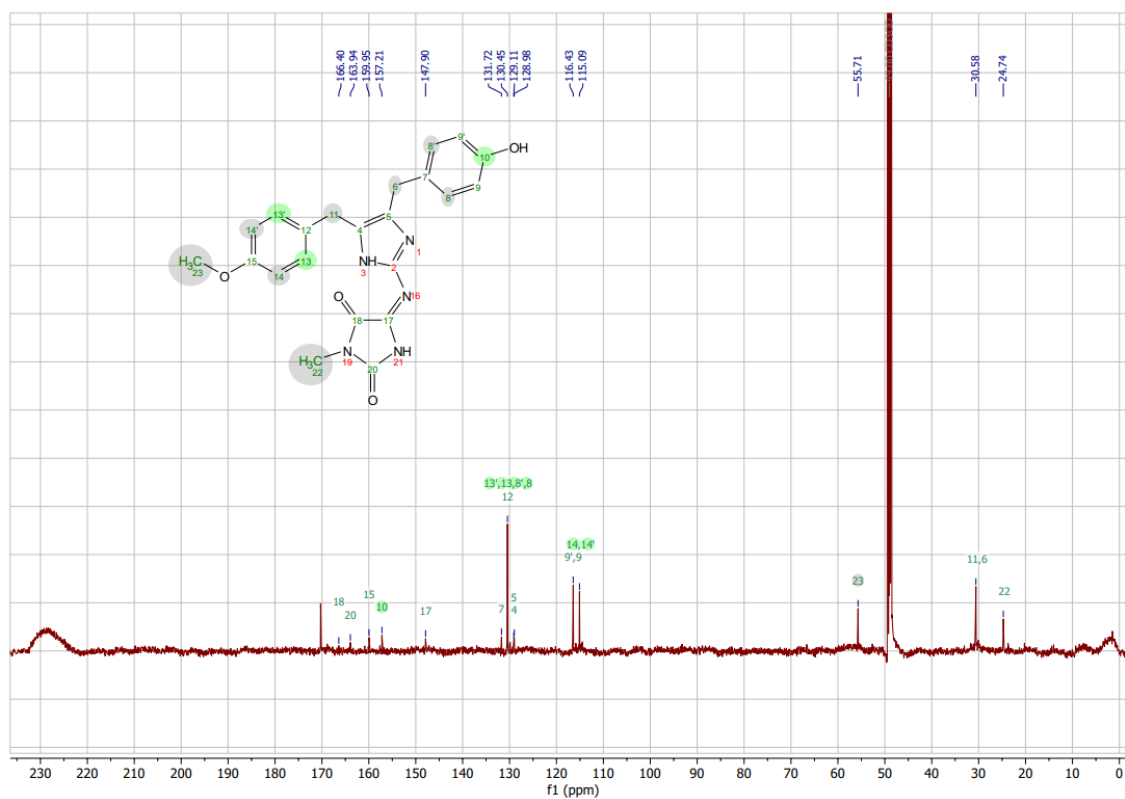

# Supporting information

**Figure S32:**  $^1\text{H}$ - $^1\text{H}$  COSY NMR (600 MHz) spectrum for naamidine J (6)

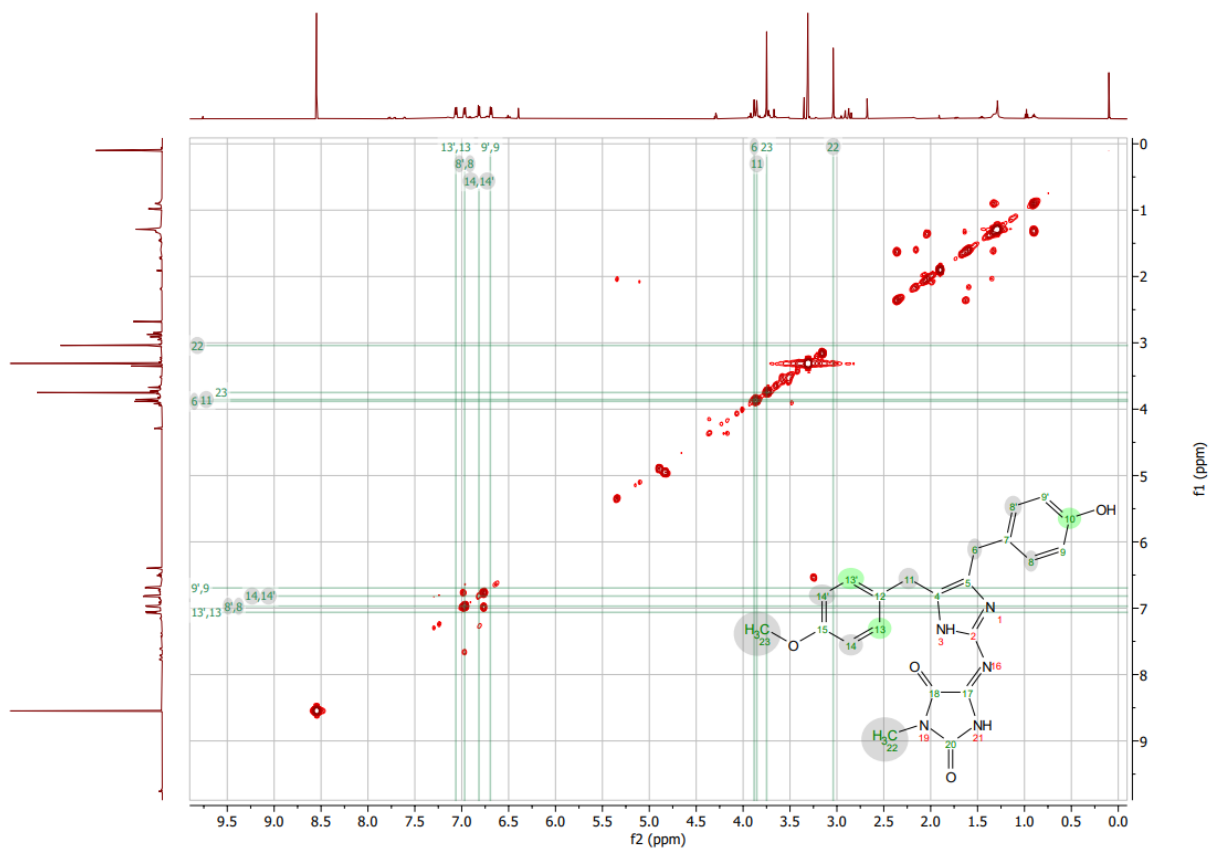

**Figure S33:**  $^1\text{H}$ - $^{13}\text{C}$  HSQC NMR (600 MHz) spectrum for naamidine J (6)

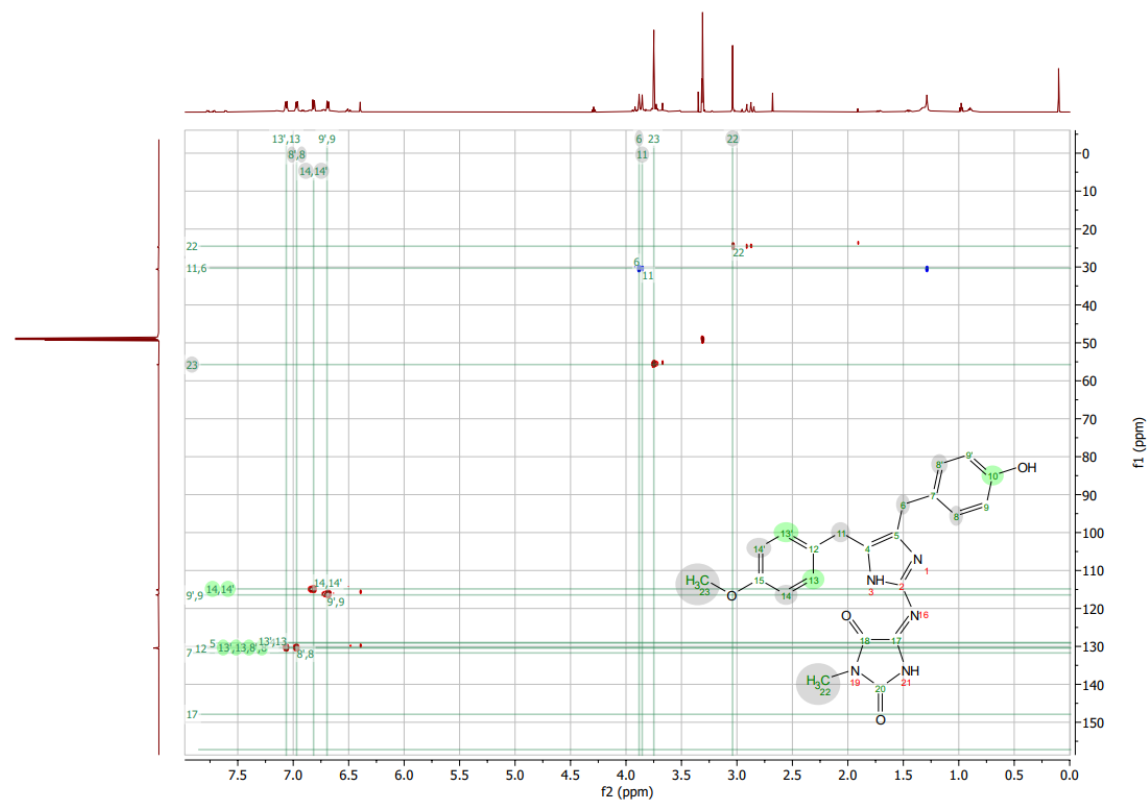

# Supporting information

**Figure S34:**  $^1\text{H}$ - $^{13}\text{C}$  HMBC NMR (600 MHz) spectrum for naamidine J (6)

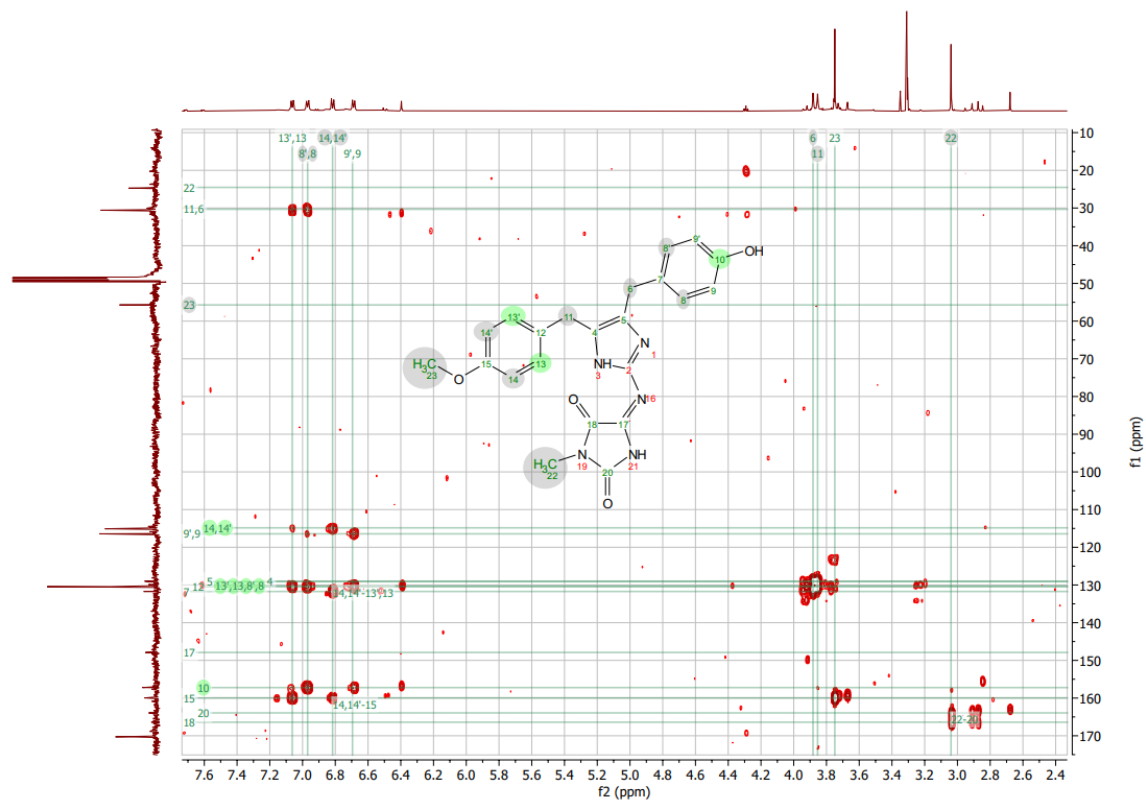

**Figure S35:**  $^1\text{H}$ - $^1\text{H}$  NOESY NMR (600 MHz) spectrum for naamidine J (6)

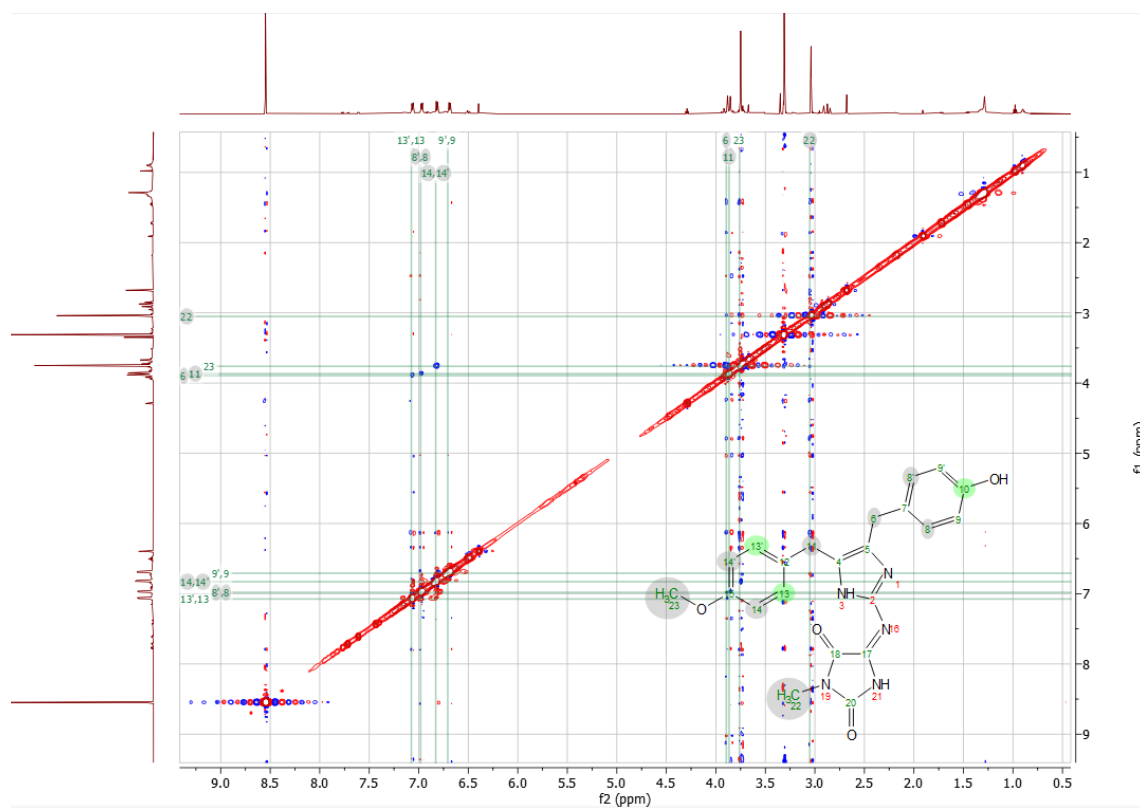

## Supporting information

**Figure S36:** HRESIMS spectrum for naamine I (7)

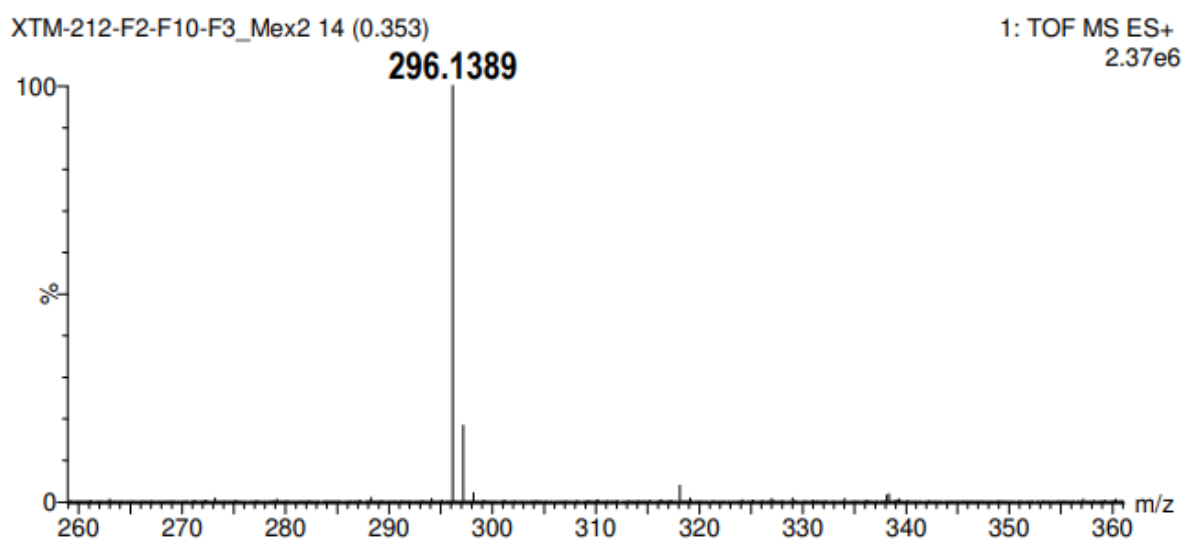

**Figure S37:** HRESIMS spectrum for naamidine K (8)

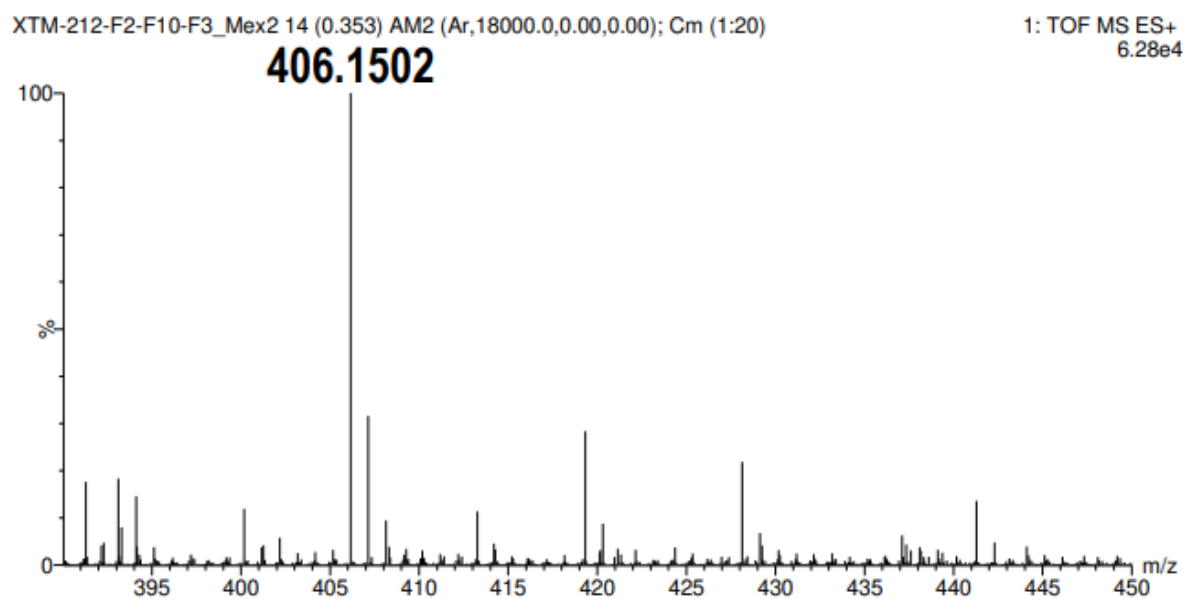

## Supporting information

**Figure S38:**  $^1\text{H}$  NMR (600 MHz,  $\text{CD}_3\text{OD}$ ) spectrum for mixture of naamine I (7) and naamidine K (8)

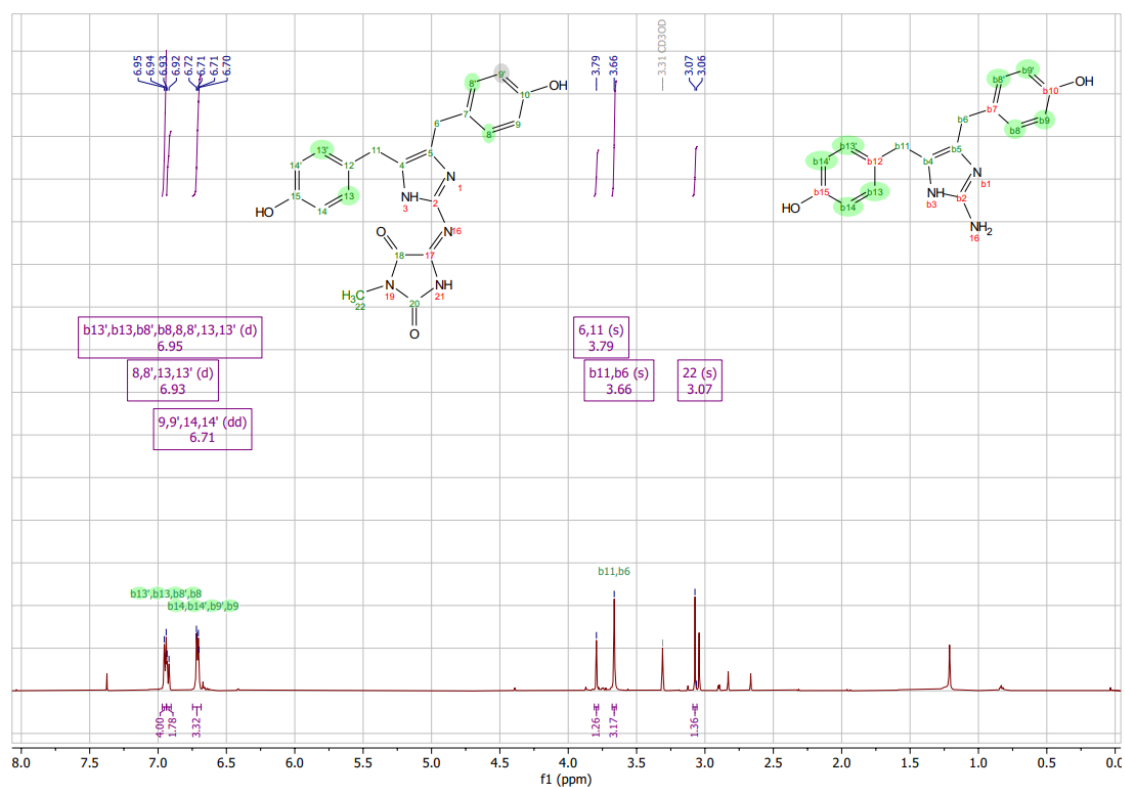

**Figure S39:**  $^1\text{H}$ - $^{13}\text{C}$  HSQC NMR (600 MHz) spectrum for mixture of naamine I (7) and naamidine K (8)

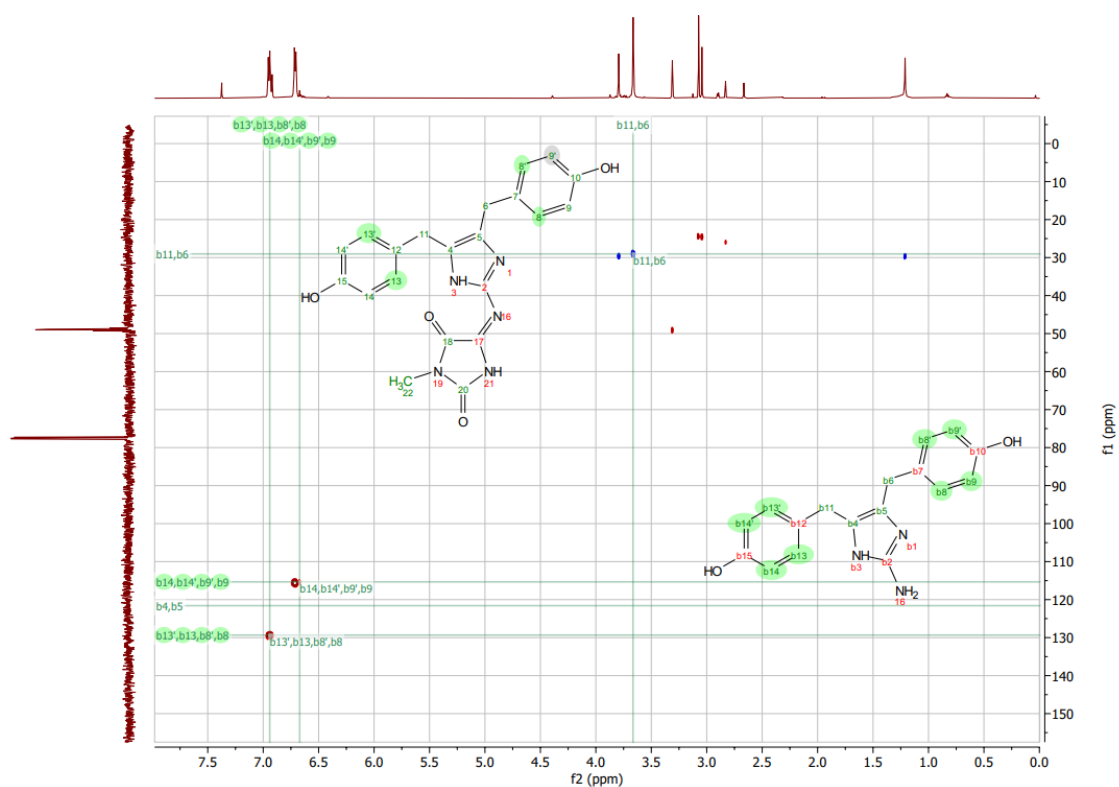



## Supporting information

**Figure S40:**  $^1\text{H}$ - $^{13}\text{C}$  HMBC NMR (600 MHz) spectrum for mixture of naamine I (7) and naamidine K (8)

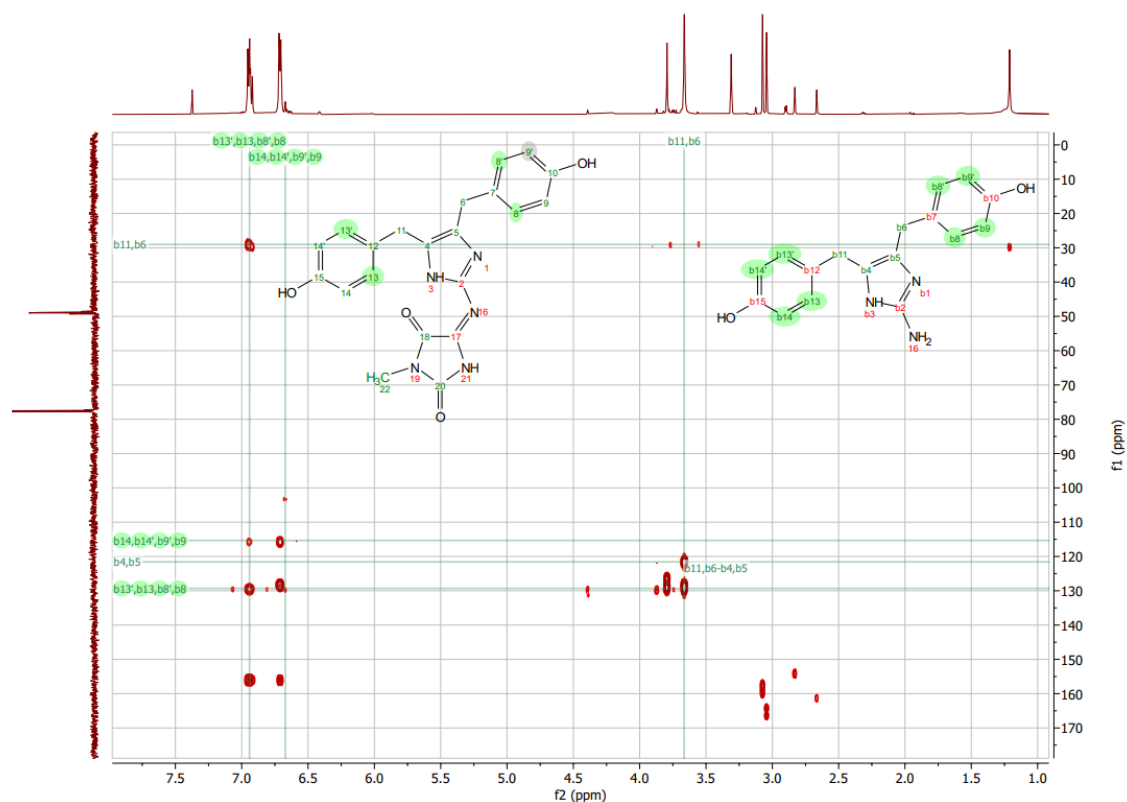

**Figure S41:**  $^1\text{H}$  NMR (600 MHz,  $\text{CD}_3\text{OD}$ ) spectrum for thymidine (9)

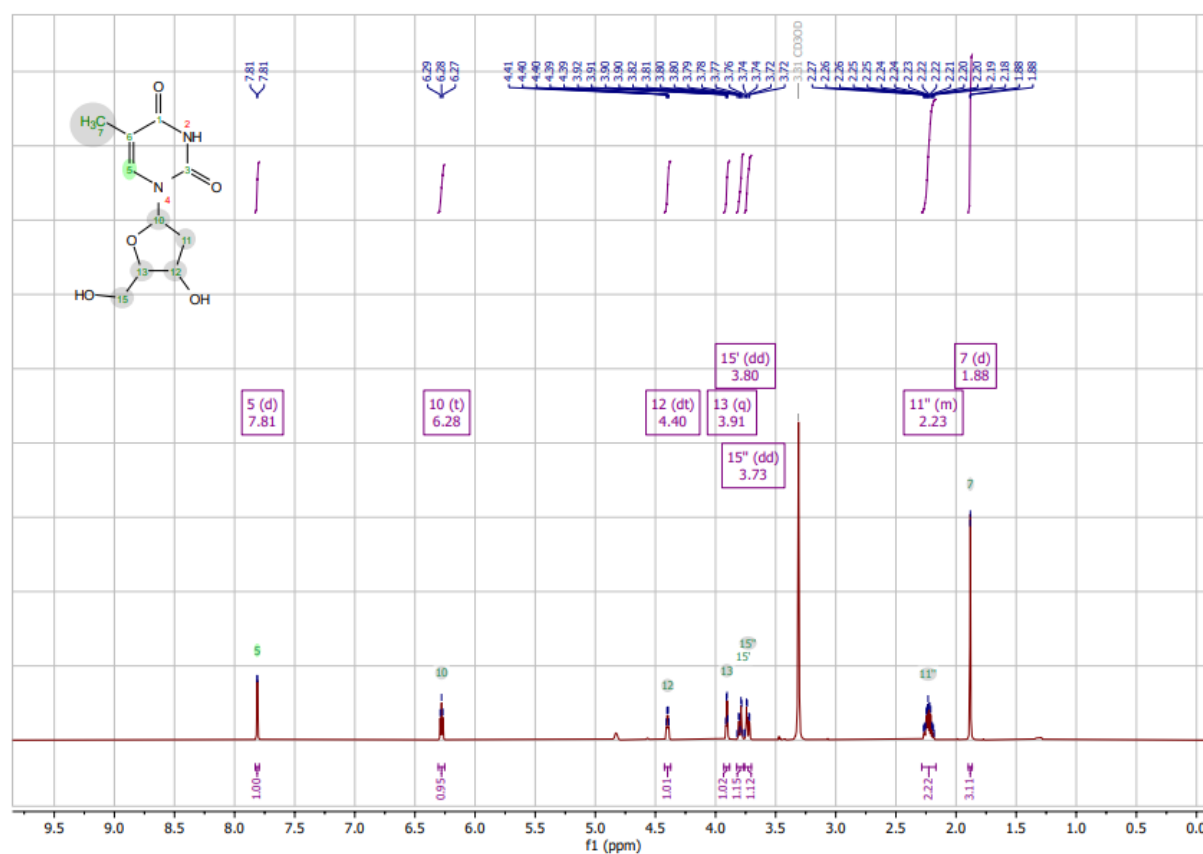

## Supporting information

**Figure S42:**  $^{13}\text{C}$  NMR (125 MHz,  $\text{CD}_3\text{OD}$ ) spectrum for thymidine (9)

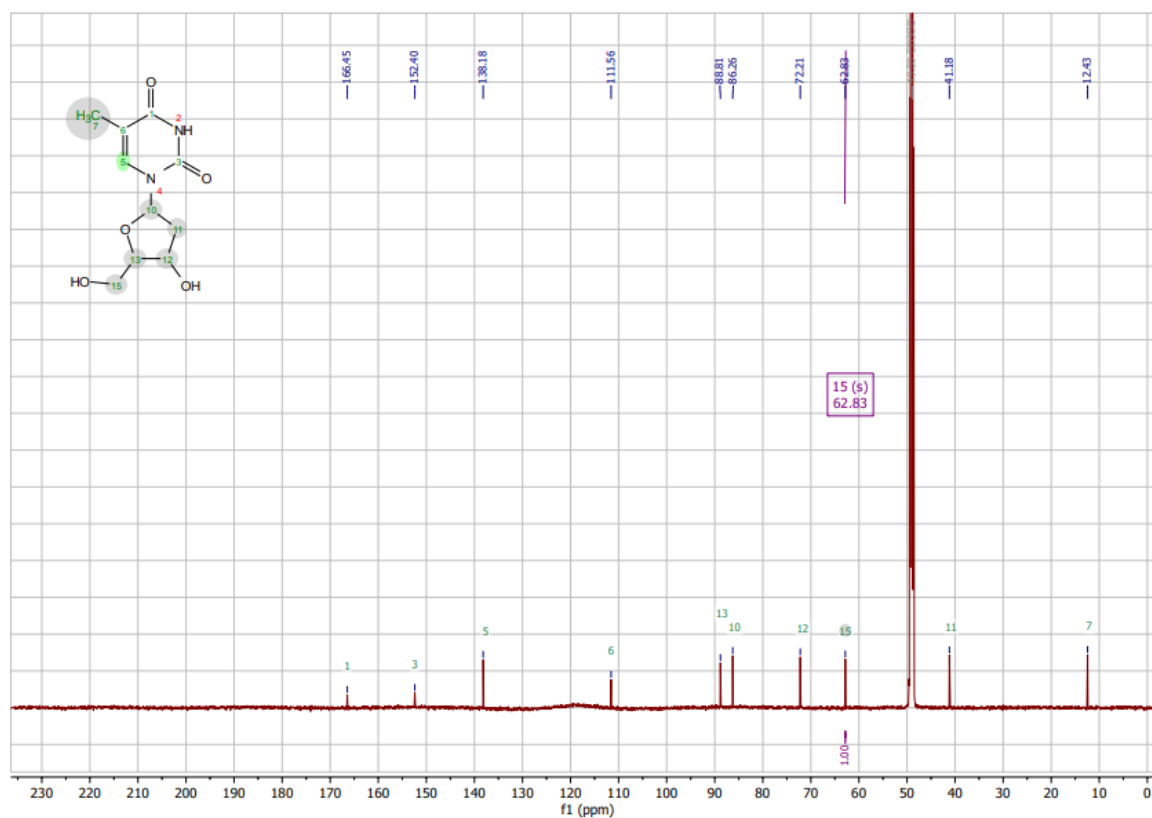

**Figure S43:**  $^1\text{H}$ - $^1\text{H}$  COSY NMR (600 MHz) spectrum for thymidine (9)

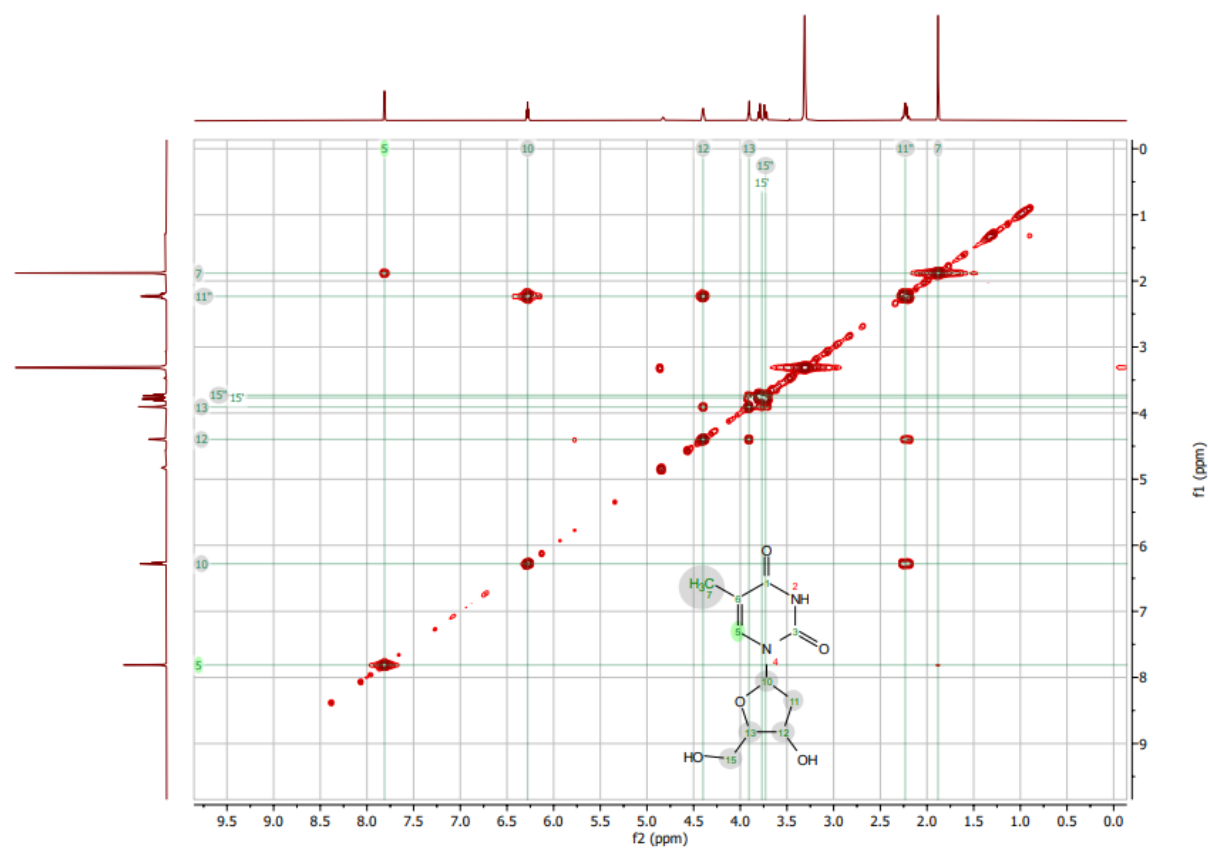

# Supporting information

**Figure S44:**  $^1\text{H}$ - $^{13}\text{C}$  HSQC NMR (600 MHz) spectrum for thymidine (9)

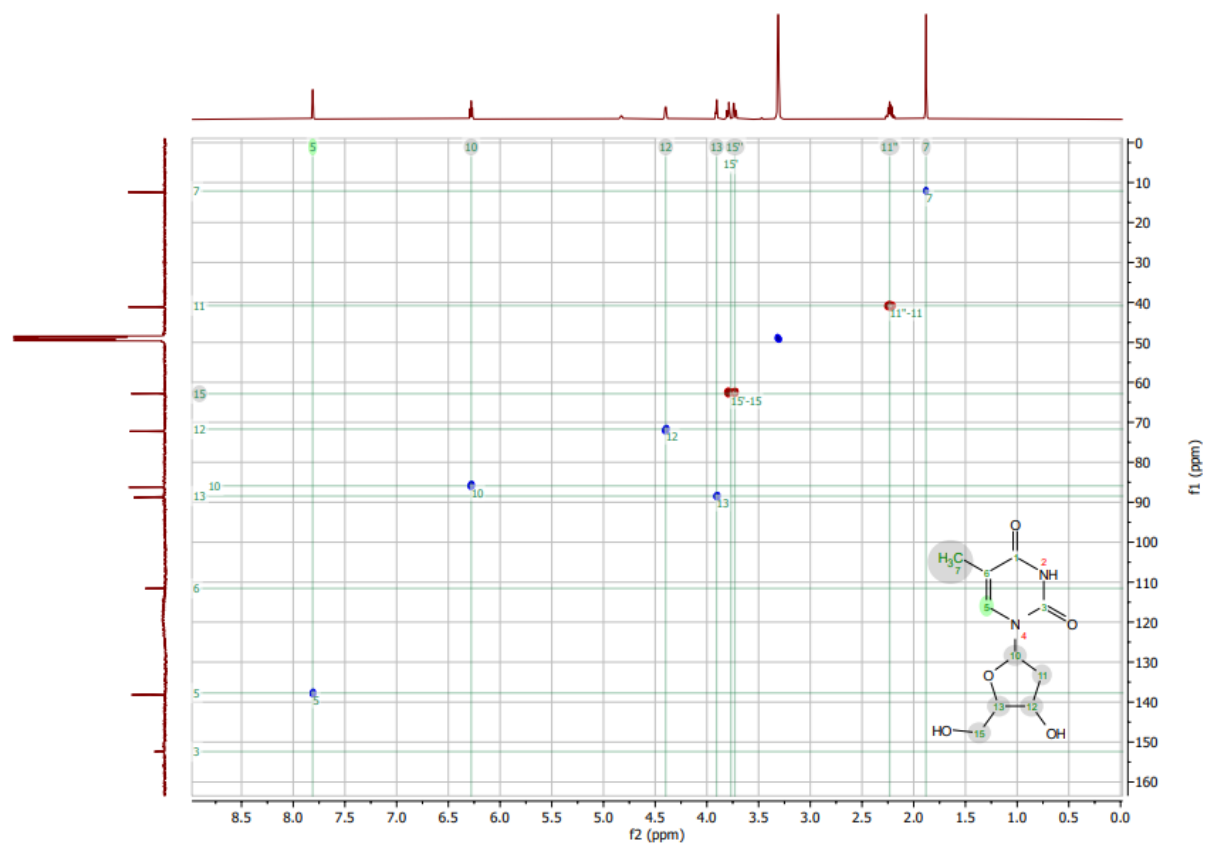

**Figure S45:**  $^1\text{H}$ - $^{13}\text{C}$  HMBC NMR (600 MHz) spectrum for thymidine (9)

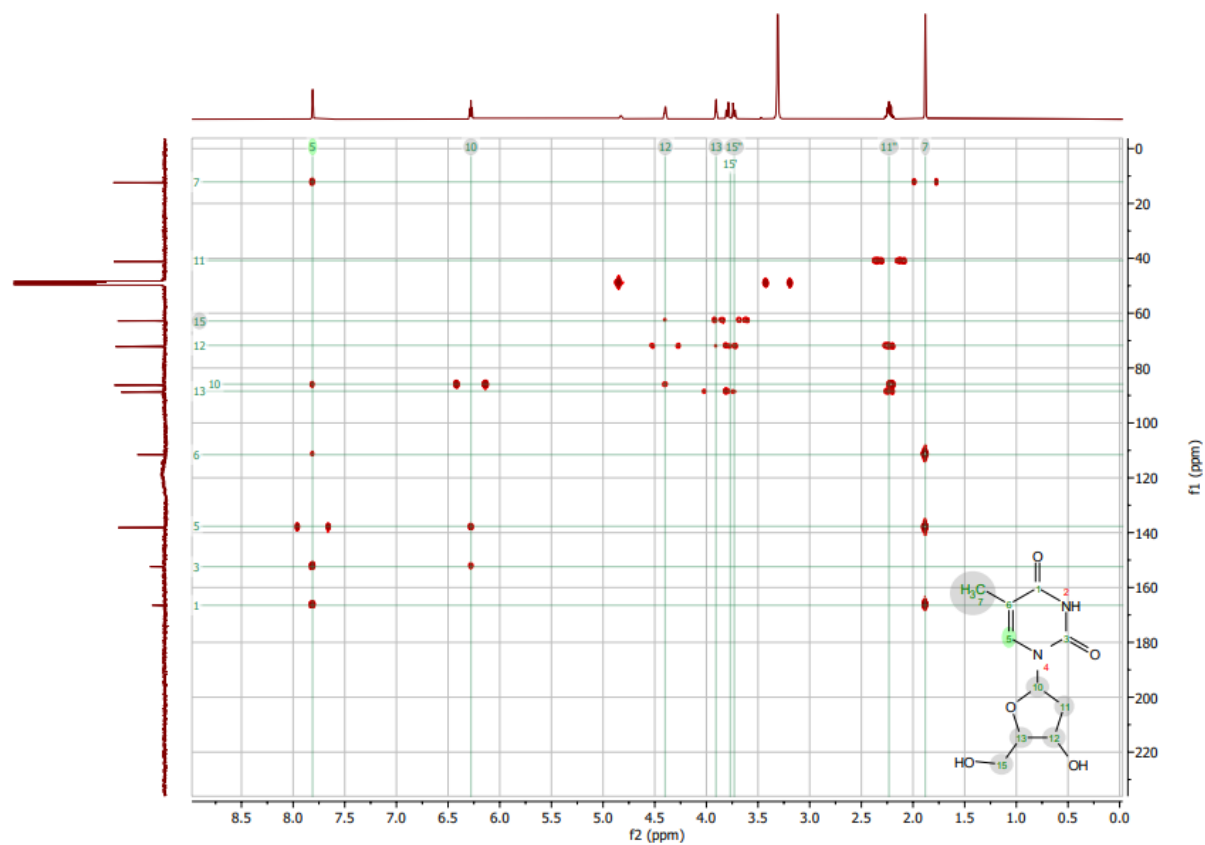

## Supporting information

**Figure S46:** MS/MS spectra of the isolated compounds were deposited in the GNPS spectral libraries under following identifier

| Compound      | GNPS accession code |
|---------------|---------------------|
| Phorbatopin E | CCMSLIB00009919260  |
| Calcaridine C | CCMSLIB00009919261  |
| Erstine A     | CCMSLIB00009919262  |
| Naamine H     | CCMSLIB00009919263  |
| Naamine I     | CCMSLIB00009919264  |
| Naamidine J   | CCMSLIB00009919265  |
| Naamidine K   | CCMSLIB00009919266  |

**Figure S47:** MS/MS spectrum of ernstine A (1)

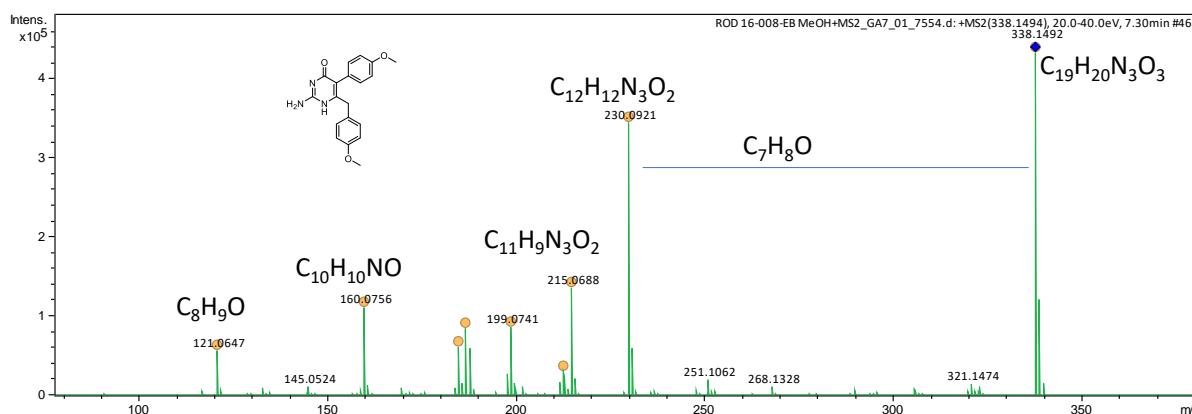

**Figure S48:** MS/MS spectrum of Phorbatopsin D (2)

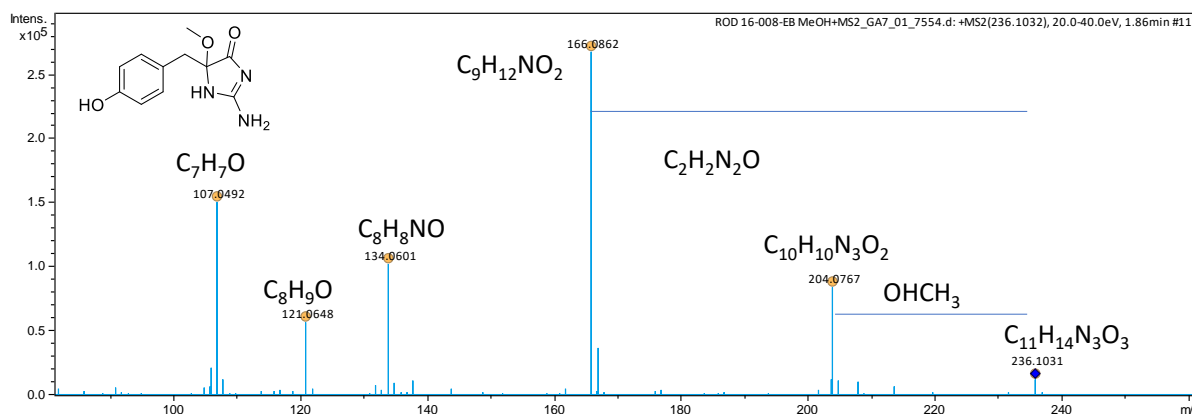

## Supporting information

**Figure S49:** MS/MS spectrum of Phorbatopsin E(3)

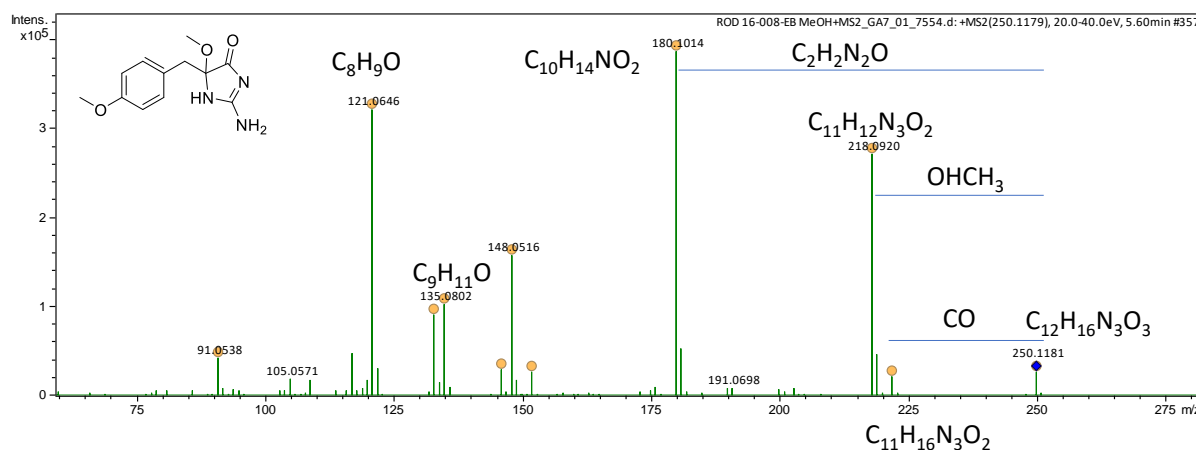

**Figure S50:** MS/MS spectrum of Naamine H (5)

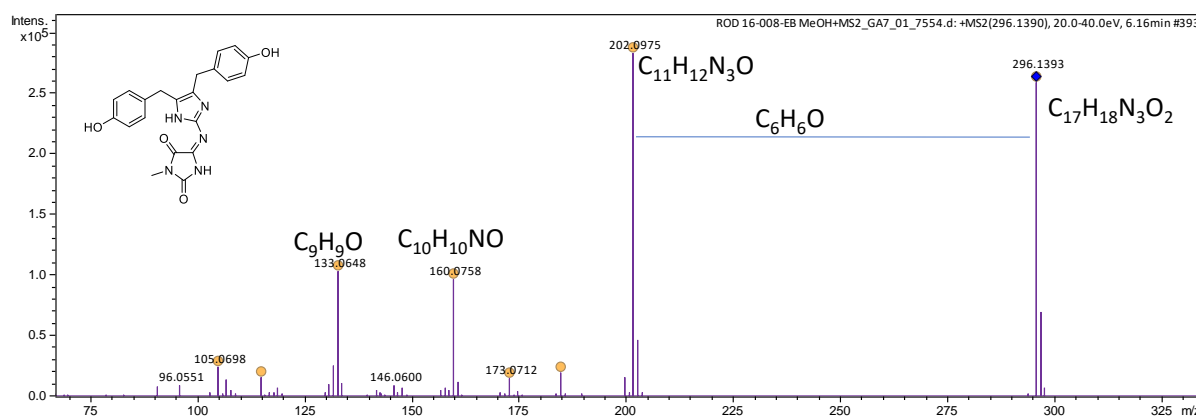

**Figure S51:** MS/MS spectrum of Naamine I (7)

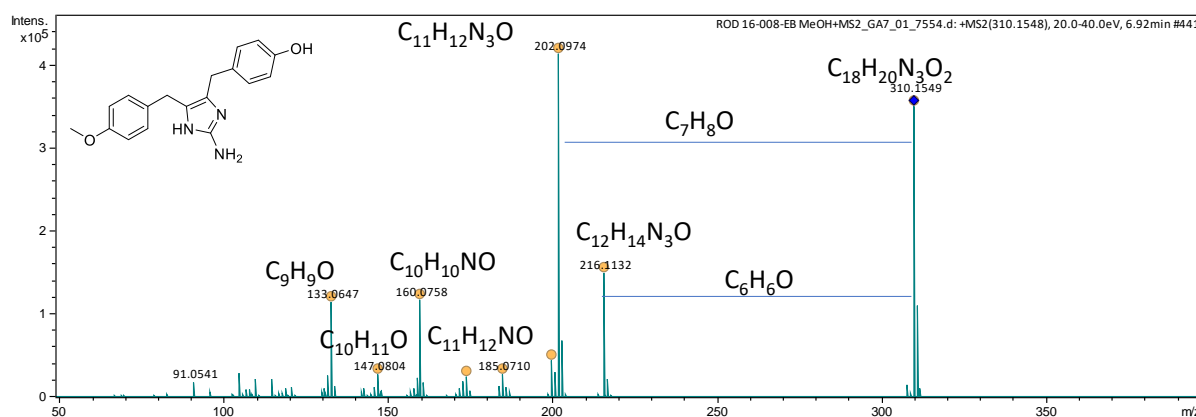

## Supporting information

**Figure S52:** MS/MS spectrum of Naamidine J (6)

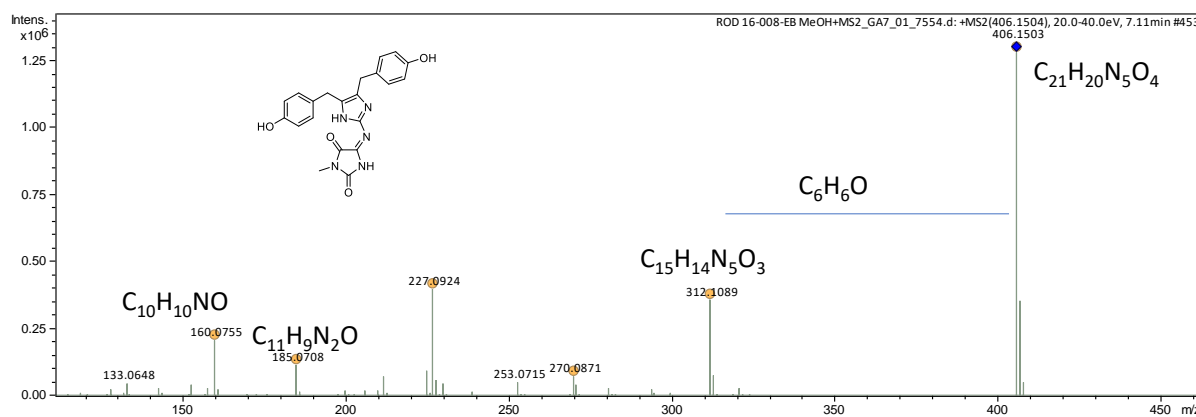

**Figure S53:** MS/MS spectrum of Naamidine K (8)

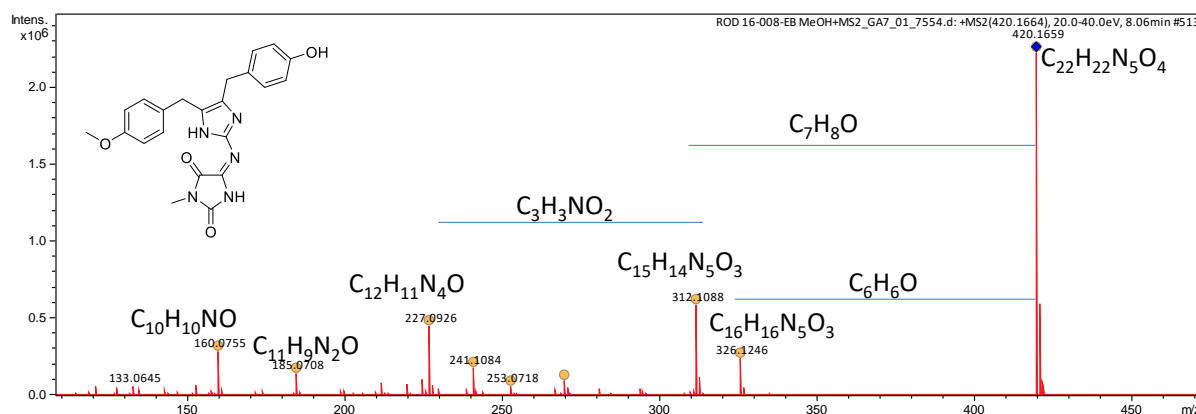

**Figure S54:** MS/MS spectrum of Calcaridine C (4)

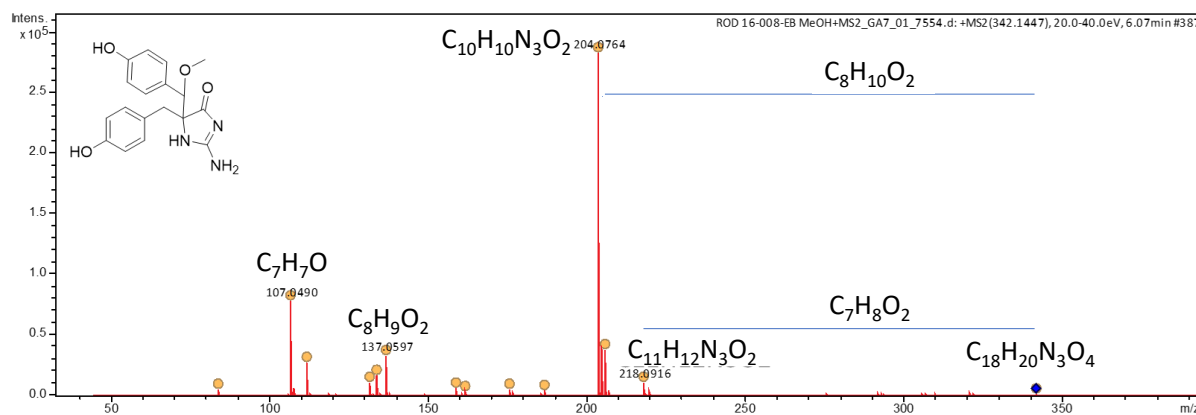

Supplement: s1 [file s1]
